# Supplementary material for: Effects of linker and liposome anchoring on lactose-functionalized glycomacromolecules as multivalent ligands for binding galectin-3
Source: PubMed Central journal article supplement — RSC Adv. 2019 Jul 29;9(41):23484–97. doi: 10.1039/c9ra05497a (PMC9069326; doi:10.1039/c9ra05497a), 2019-07-29
Supplement: RA-009-C9RA05497A-s001.pdf [file RA-009-C9RA05497A-s001.pdf]

## Supporting Information

# Effects of Linker and Liposome Anchoring on Lactose-functionalized Glycomacromolecules as Multivalent Ligands for Binding Galectin-3

*Tanja Freichel<sup>[a]</sup>, Dominic Laaf<sup>[b]</sup>, Miriam Hoffmann<sup>[a]</sup>, Patrick B. Konietzny<sup>[a]</sup>, Robert Wawrzinek<sup>[c]</sup>, Viktoria Heine<sup>[b]</sup>, Christoph Rademacher<sup>[c]</sup>, Nicole L. Snyder<sup>[d]</sup>, Lothar Elling<sup>[b]</sup> and Laura Hartmann<sup>[a]</sup> †*

[a] Department of Organic and Macromolecular Chemistry, Heinrich-Heine-University Düsseldorf, Universitätsstraße 1, 40225 Düsseldorf, Germany.

[b] Laboratory for Biomaterials, Institute for Biotechnology and Helmholtz-Institute for Biomedical Engineering, RWTH Aachen University, Pauwelsstraße 20, 52074 Aachen, Germany.

[c] Max Planck Institute of Colloids and Interfaces, Mühenberg 1, 14476 Potsdam, Germany.

[d] Department of Chemistry, Davidson College, North Carolina 28035, United States.

Corresponding authors: [laura.hartmann@hhu.de](mailto:laura.hartmann@hhu.de)

## Contents

|                                                                                                           |    |
|-----------------------------------------------------------------------------------------------------------|----|
| 1. Additional information on synthesis of glycomacromolecules and liposome formulation .....              | 3  |
| 1.1. Additional information on the characterization of the functionalization degree of the liposomes..... | 4  |
| 2. Additional information on binding studies of glycomacromolecules.....                                  | 6  |
| 3. Analytical data of glycomacromolecules .....                                                           | 9  |
| 3.1. Gal(1)-2, <b>1</b> .....                                                                             | 9  |
| 3.2. Gal(1,3,5)-6, <b>2</b> .....                                                                         | 10 |
| 3.3. Gal(1,2,3)-4, <b>3</b> .....                                                                         | 12 |
| 3.4. Lac(1)-2, <b>4</b> .....                                                                             | 14 |
| 3.5. Lac(1)-2, <b>4*</b> .....                                                                            | 16 |
| 3.6. Lac(2)-3, <b>5</b> .....                                                                             | 18 |
| 3.7. Lac(1,5)-5, <b>6</b> .....                                                                           | 20 |
| 3.8. Lac(1,5,9)-9, <b>7</b> .....                                                                         | 22 |
| 3.9. Lac(1,4,7)-8, <b>8</b> .....                                                                         | 24 |
| 3.10. Lac(1,3,5)-6, <b>9</b> .....                                                                        | 26 |
| 3.11. Lac(1,3,5)-6, <b>9*</b> .....                                                                       | 28 |
| 3.12. Lac(1,2,3)-4, <b>10</b> .....                                                                       | 30 |
| 3.13. Lac(1,2,3)-4, <b>10*</b> .....                                                                      | 32 |
| 3.14. Lac <sub>3</sub> TPD, <b>11</b> .....                                                               | 34 |
| 3.15. Lac(1,2,3,4,5,6)-7, <b>12</b> .....                                                                 | 36 |
| 3.16. Lac(2)-3 L, <b>13</b> .....                                                                         | 38 |
| 3.17. Lac(1,5)-5 L, <b>14</b> .....                                                                       | 40 |
| 3.18. Lac(1,5,9)-9 L, <b>15</b> .....                                                                     | 42 |
| 3.19. Glc(1,3,5)-6, <b>16</b> .....                                                                       | 44 |
| 3.20. Glc(1,3,5)-6, <b>16*</b> .....                                                                      | 46 |
| 4. Analytical data for glycomacromolecule-lipid conjugates .....                                          | 49 |
| 4.1. Lac(1)-2-PEG-DSPE-conjugate, <b>L4</b> .....                                                         | 49 |
| 4.2. Lac(1,3,5)-6-PEG-DSPE-conjugate, <b>L9</b> .....                                                     | 50 |
| 4.3. Lac(1,2,3)-4-PEG-DSPE-conjugate, <b>L10</b> .....                                                    | 52 |
| 4.4. Glc(1,3,5)-6-PEG-DSPE-conjugate, <b>L16</b> .....                                                    | 54 |
| 5. Analytical data of liposomes .....                                                                     | 55 |

# 1. Additional information on synthesis of glycomacromolecules and liposome formulation

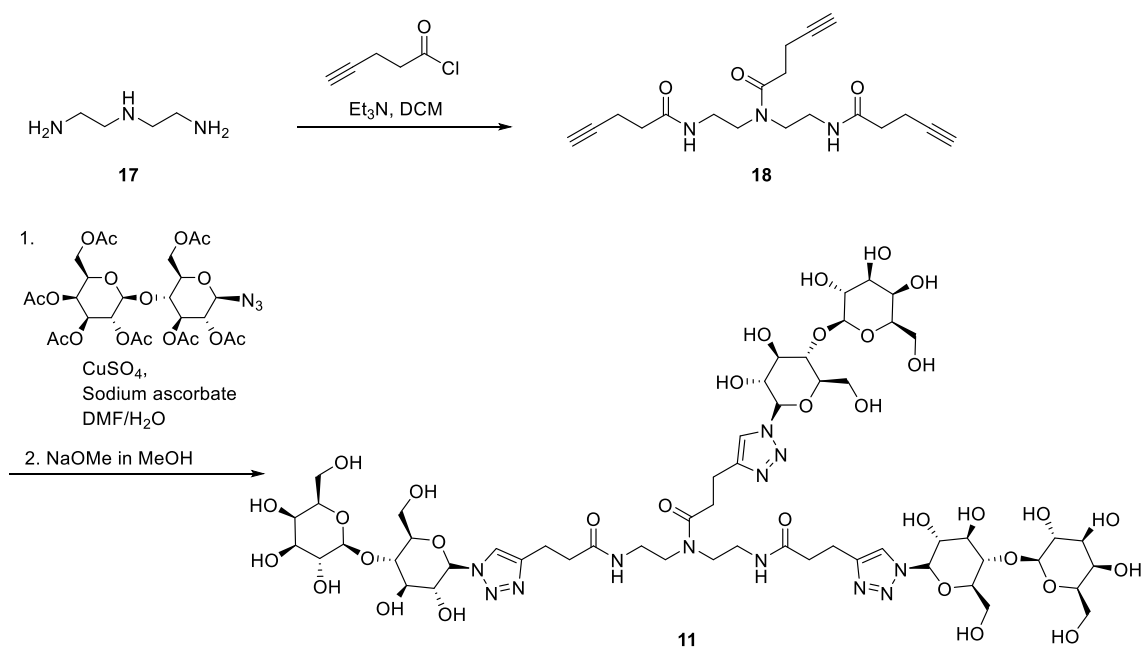

**Scheme S 1:** Scheme of the synthesis of compound 11.

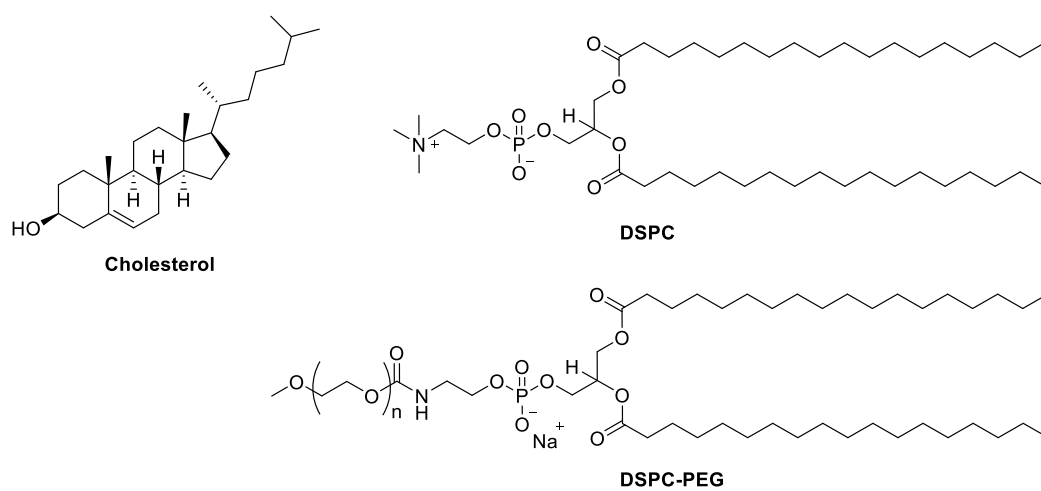

**Figure S 1:** Components used for the liposome formulation.

1.1. Additional information on the characterization of the functionalization degree of the liposomes

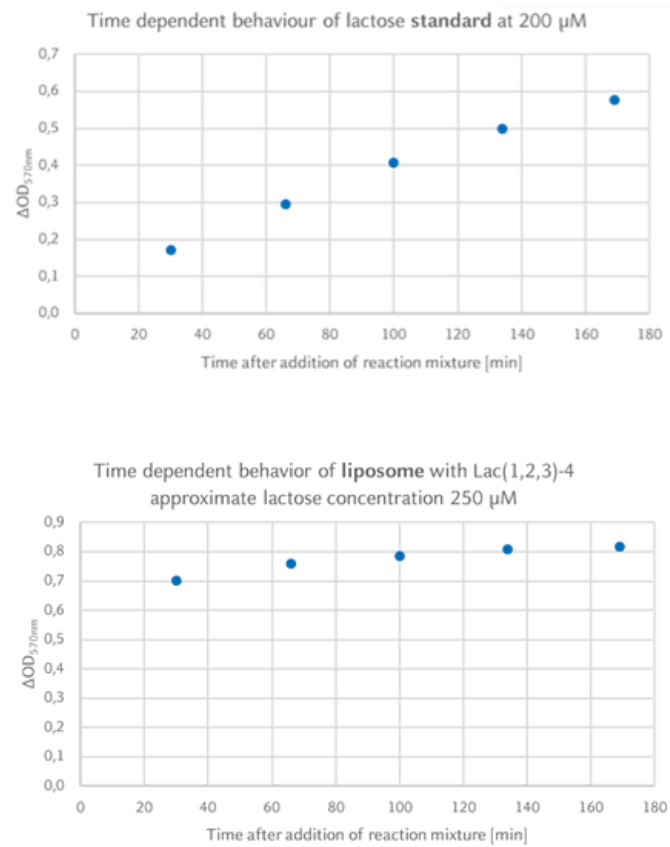

**Figure S 2:** Results of the Lactose-Assay Kit measuring the time dependent behavior of the absorbent resulting from the conversion of the lactose standard provided by the kit (top) and of the liposome **L10** (bottom).

**A**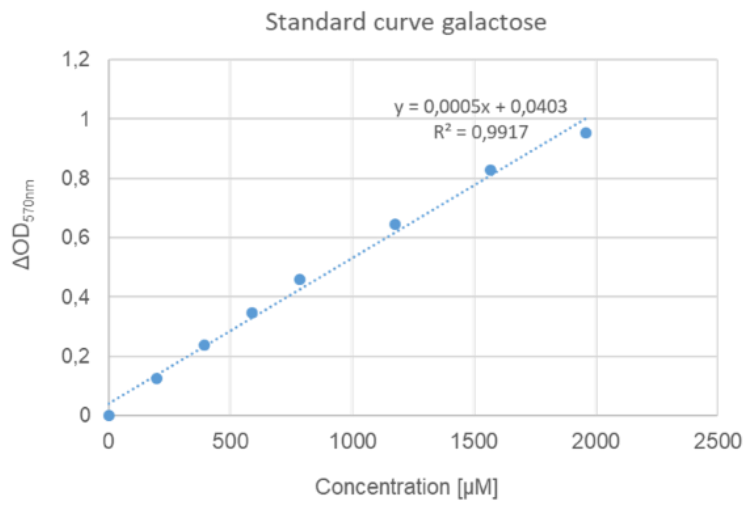**B**

| Sample       | Measured conc. [ $\mu\text{M}$ ] | Theoretical conc.* [ $\mu\text{M}$ ] |
|--------------|----------------------------------|--------------------------------------|
| Liposome L4  | 143 $\pm$ 19                     | 149                                  |
| Liposome L9  | 389 $\pm$ 53                     | 376                                  |
| Liposome L10 | 320 $\pm$ 54                     | 447                                  |

**Figure S 3:** Results of the lactose-assay kit: Resulting lactose concentration (B) using the galactose standard curve (A). \*calculated from total amount of weighted lipids in consideration of coupling efficiency and for 100 % of lactose-oligomer on outer surface of liposome.

## 2. Additional information on binding studies of glycomacromolecules

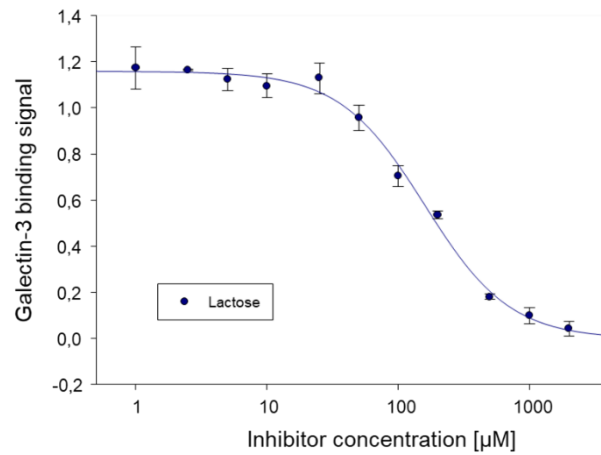

**Figure S 4:** ELISA inhibition curve of Gal-3 with lactose.

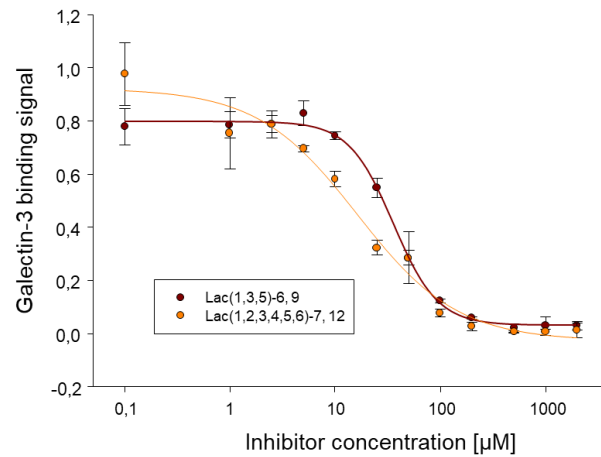

**Figure S 5:** ELISA inhibition curve of Gal-3 with glycomacromolecules **9** and **12**.

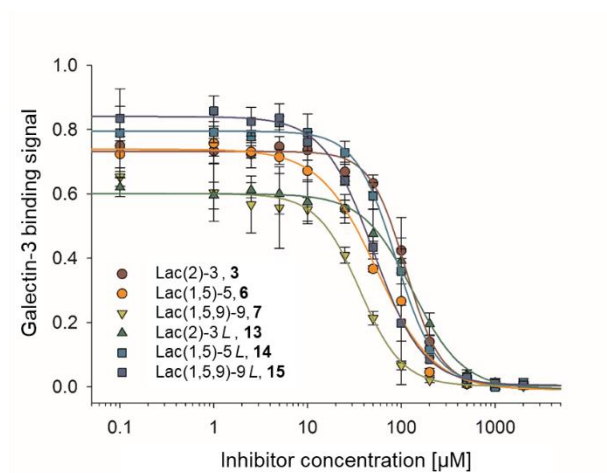

**Figure S 6:** ELISA inhibition curve of Gal-3 with glycomacromolecules **3,6,7** and **13-15**.

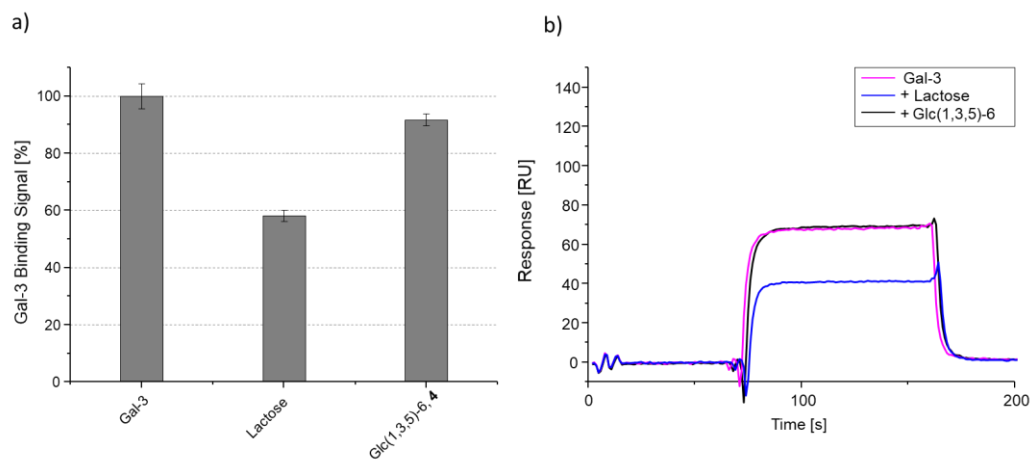

**Figure S 7:** Results from the SPR inhibition studies of Gal-3 with the controls lactose and Glc(1,3,5)-6, **16**.

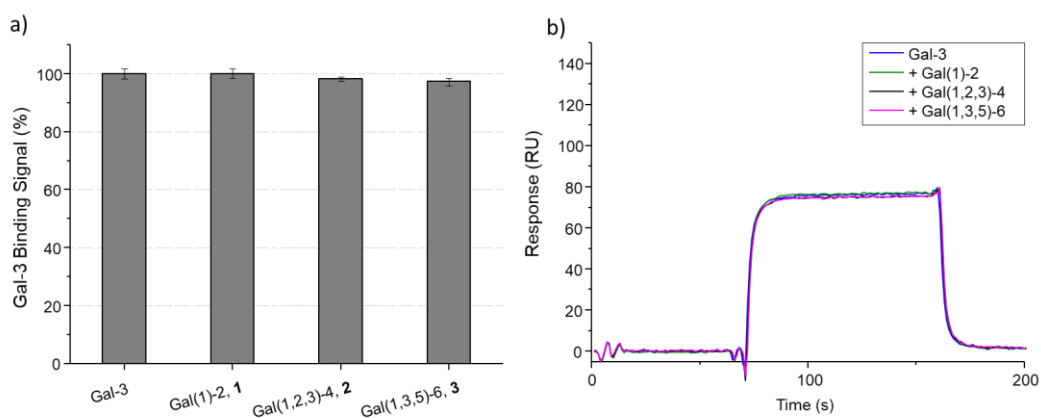

**Figure S 8:** Results from the SPR inhibition studies of Gal-3 with galactose samples **1**, **2** and **3**.

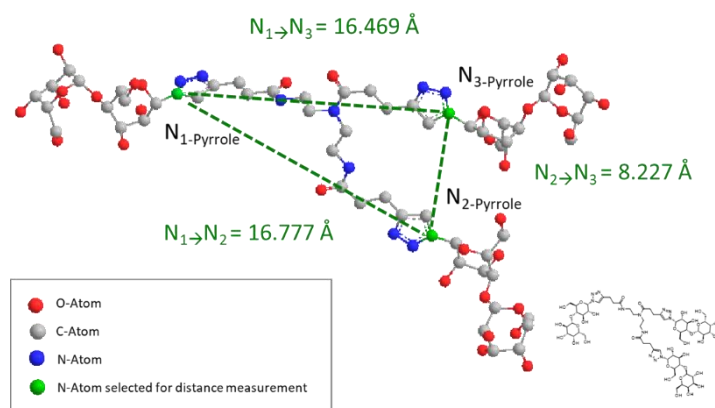

**Figure S 9:** Chem3D-simulation and measurement of the distances between the three nitrogen-atoms of the triazoles (marked in green) of Lac<sub>3</sub>TPD **11** after MM2 conformational minimization.

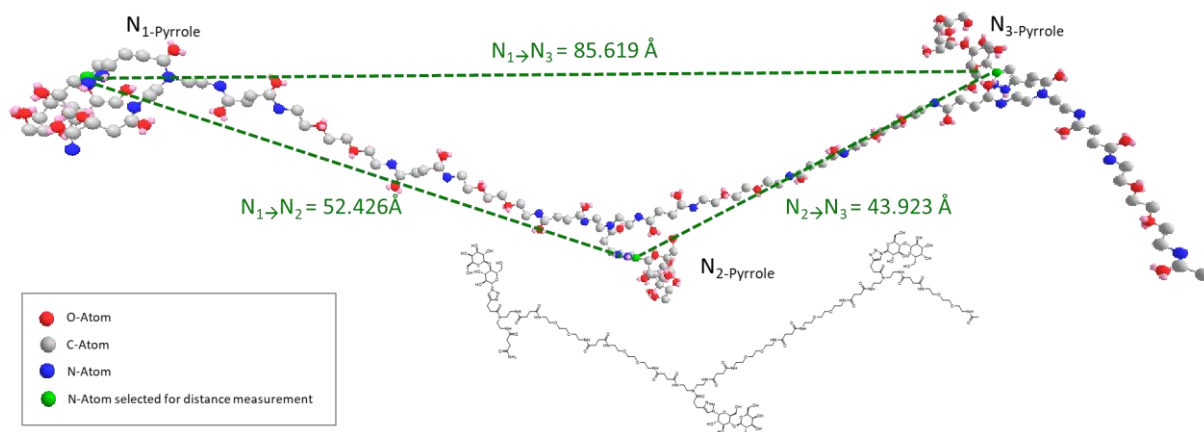

**Figure S 10:** Chem3D-simulation and measurement of the distances between the three nitrogen-atoms of the triazoles (marked in green) of Lac<sub>3</sub>TPD **8** after MM2 conformational minimization.



### 3. Analytical data of glycomacromolecules

#### 3.1. Gal(1)-2, **1**

$^1\text{H-NMR}$  (300 MHz, Deuterium Oxide)  $\delta$  [ppm]: 7.90 (s, 1 H, triazole-CH), 4.65 (t,  $J = 5.1$  Hz, 2 H, -N-N- $\text{CH}_2$ -), 4.37 (d,  $J = 7.8$  Hz, 1 H,  $\text{CH}_{\text{anomerGal}}$ ), 4.29 (dt,  $J = 11.6, 4.8$  Hz, 1 H, - $\text{CH}_{\text{pyranose}}$ ), 4.09 (dt,  $J = 11.1, 5.2$  Hz, 1 H,  $\text{CH}_{\text{pyranose}}$ ), 3.91 (dd,  $J = 3.4, 1.0$  Hz, 1 H, -- $\text{CH}_{\text{pyranose}}$ ), 3.78 – 3.72 (m, 2 H,  $\text{CH}_{\text{pyranose}}$ ), 3.70 – 3.58 (m, 10 H,  $\text{CH}_{\text{pyranose}}$ , O- $\text{CH}_2$ -), 3.54 – 3.29 (m, 13 H,  $\text{CH}_{\text{pyranose}}$ , C=ONH- $\text{CH}_2$ ), 3.01 (t,  $J = 7.1$  Hz, 2 H, CH=C- $\text{CH}_2$ ), 2.79 (t,  $J = 7.2$  Hz, 2 H, CH=C- $\text{CH}_2$ - $\text{CH}_2$ ), 2.56 – 2.41 (m, 8 H, , NHC=O- $\text{CH}_2$ ), 2.00 (s, 3H, - $\text{CH}_3$ ).  
HR-MS (ESI) calc. for  $\text{C}_{33}\text{H}_{59}\text{N}_9\text{O}_{14}$   $[\text{M}+2\text{H}]^{2+}$  402.7085; found 402.7084. Yield: 51 mg (63 %).

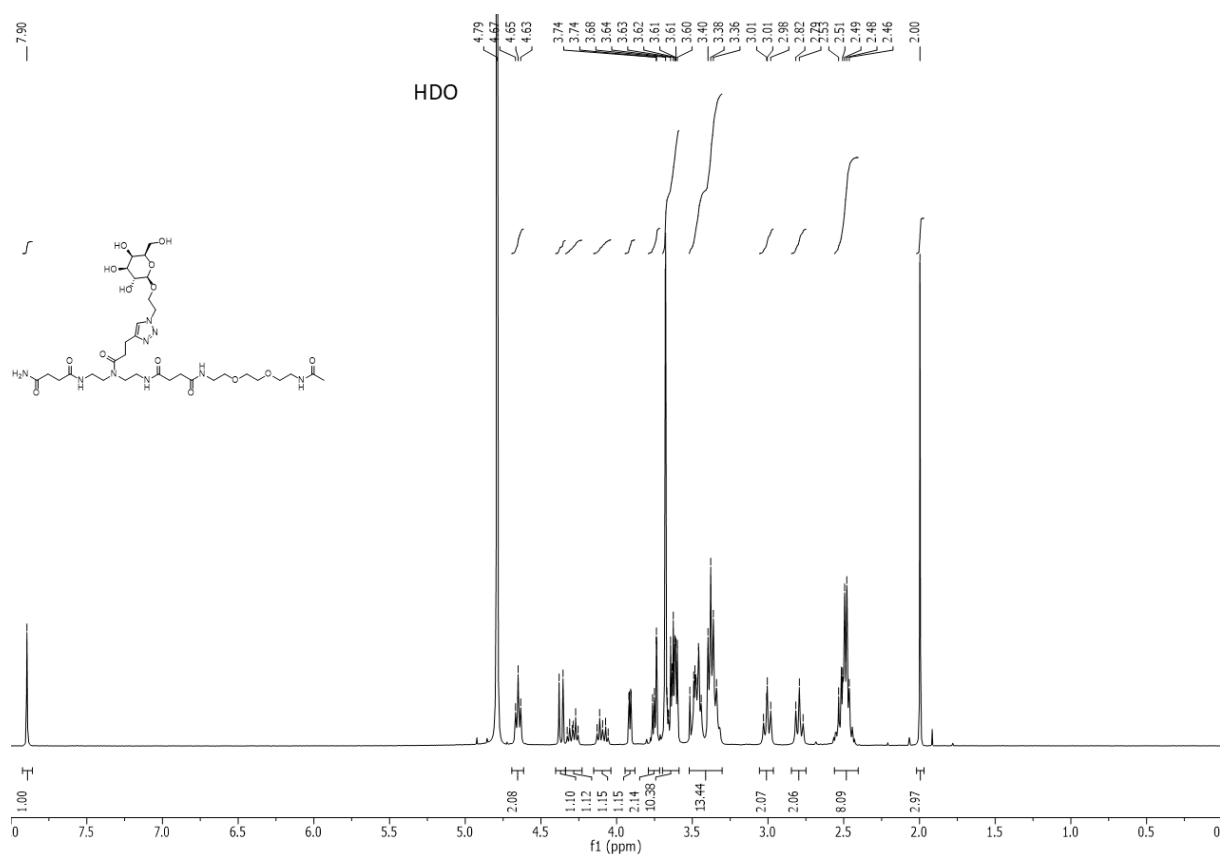

**Figure S 11:**  $^1\text{H-NMR}$  spectrum of compound **1**.

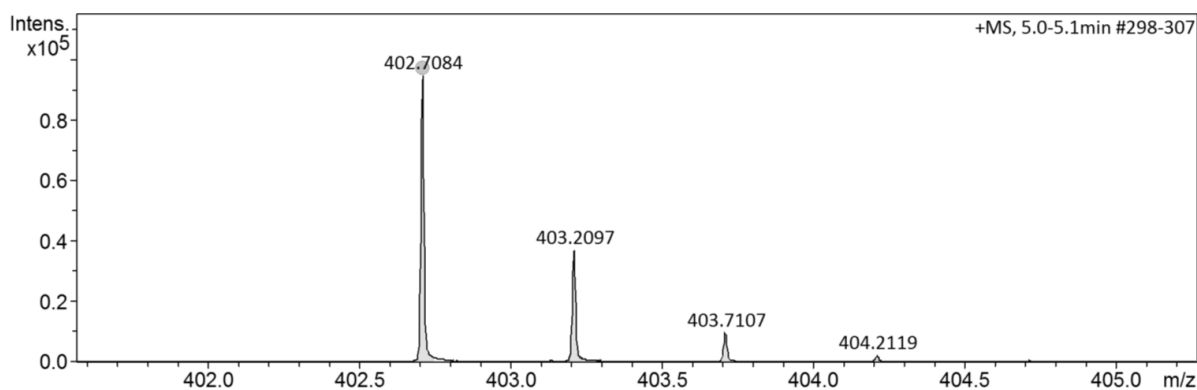

**Figure S 12:** HR-MS spectrum of compound **1**.

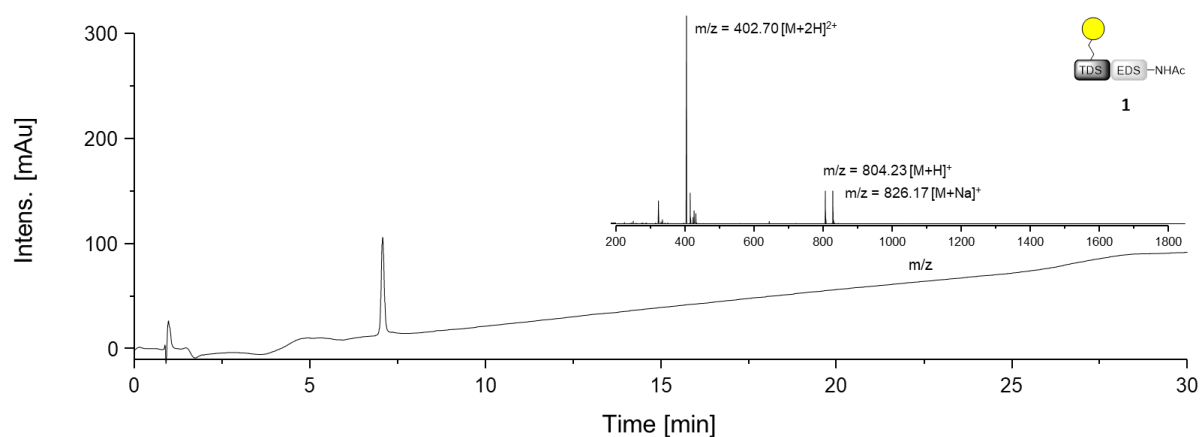

**Figure S 13:** RP-HPLC and ESI-MS spectrum of compound **1**.

### 3.2. Gal(1,3,5)-6, **2**

$^1\text{H-NMR}$  (300 MHz, Deuterium Oxide)  $\delta$  [ppm]: 7.90 (s, 3 H, triazole-CH), 4.65 (t,  $J = 5.0$  Hz, 6 H, -N-N- $\text{CH}_2$ -), 4.37 (d,  $J = 7.8$  Hz, 3 H,  $\text{CH}_{\text{anomer}}$ Gal), 4.29 (dt,  $J = 9.9, 4.8$  Hz, 3 H,  $\text{CH}_{\text{pyranose}}$ ), 4.09 (dt,  $J = 11.0, 5.1$  Hz, 3H,  $\text{CH}_{\text{pyranose}}$ ), 3.91 (d,  $J = 3.3$  Hz, 3H,  $\text{CH}_{\text{pyranose}}$ ), 3.78 – 3.71 (m, 6 H,  $\text{CH}_{\text{pyranose}}$ ), 3.70 – 3.56 (m, 30 H,  $\text{CH}_{\text{pyranose}}$ , O- $\text{CH}_2$ -), 3.53 – 3.30 (m, 39H,  $\text{CH}_{\text{pyranose}}$ , C=ONH- $\text{CH}_2$ ), 3.00 (t,  $J = 7.1$  Hz, 6 H, CH=C- $\text{CH}_2$ ), 2.79 (t,  $J = 7.2$  Hz, 6 H CH=C- $\text{CH}_2$ - $\text{CH}_2$ ), 2.53-2.44 (m, 24 H, NH-C=O- $\text{CH}_2$ -), 2.00 (s, 3H, - $\text{CH}_3$ ). HR-MS (ESI) calc. for  $\text{C}_{95}\text{H}_{164}\text{N}_{25}\text{O}_{40}$   $[\text{M}+3\text{H}]^{3+}$  765.0517; found 765.0522. Yield: 119 mg (52 %).

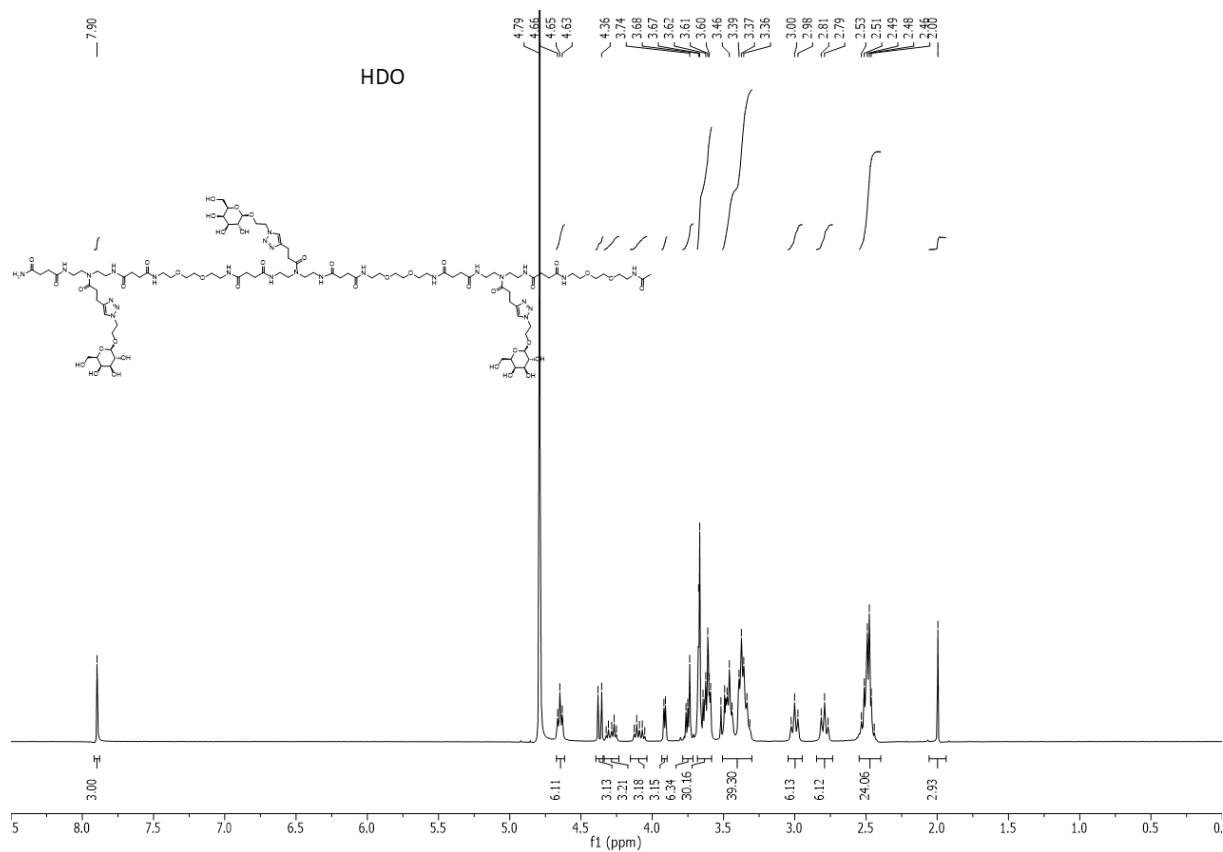

**Figure S 14:**  $^1\text{H-NMR}$  spectrum of compound **2**.

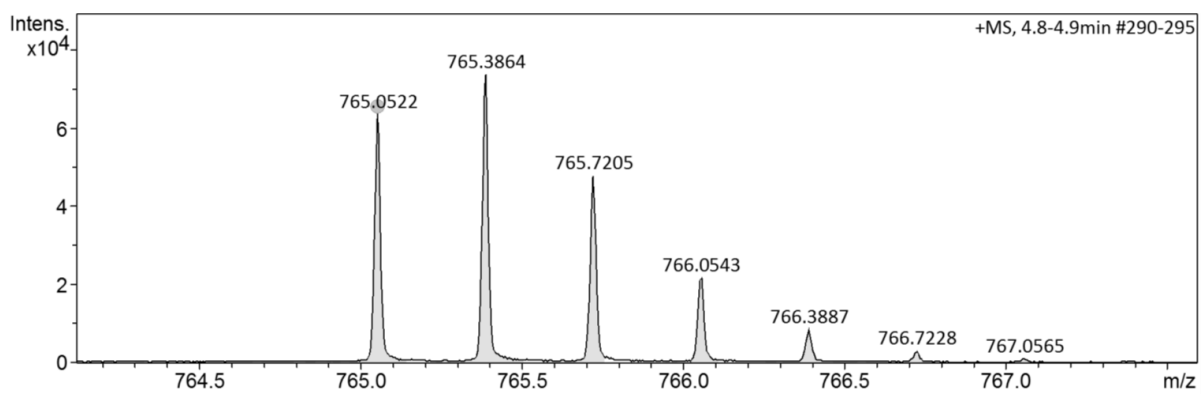

**Figure S 15:** HR-MS spectrum of compound **2**.

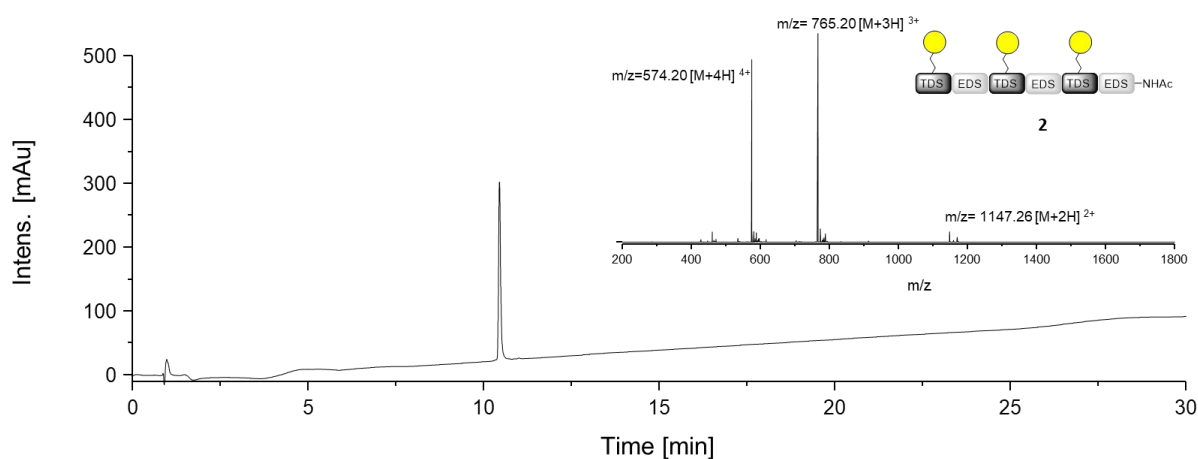

**Figure S 16:** RP-HPLC and ESI-MS spectrum of compound **2**.

### 3.3 Gal(1,2,3)-4, **3**

$^1\text{H-NMR}$  (300 MHz,  $\text{D}_2\text{O}$ )  $\delta$  [ppm] 7.89 (s, 3H, triazole-CH), 4.64 (t,  $J = 4.7$  Hz, 6H, -N-N- $\text{CH}_2$ -), 4.37 (d,  $J = 7.8$  Hz, 3H,  $\text{CH}_{\text{anomerGal}}$ ), 4.28 (dt,  $J = 9.9, 4.7$  Hz, 3H, - $\text{CH}_{\text{pyranose}}$ ), 4.09 (dt,  $J = 10.8, 5.0$  Hz, 3H, - $\text{CH}_{\text{pyranose}}$ ), 3.91 (d,  $J = 3.0$  Hz, 3H, - $\text{CH}_{\text{pyranose}}$ ), 3.81 – 3.71 (m, 6H, - $\text{CH}_{\text{pyranose}}$ ), 3.70 – 3.58 (m, 15H,  $\text{CH}_{\text{pyranose}}$ , O- $\text{CH}_2$ -), 3.53 – 3.29 (m, 30H,  $\text{CH}_{\text{pyranose}}$ , C=ONH- $\text{CH}_2$ ), 3.04 – 2.92 (m, 6H, CH=C- $\text{CH}_2$ ), 2.78 (t,  $J = 7.0$  Hz, 6H, CH=C- $\text{CH}_2$ - $\text{CH}_2$ ), 2.53-2.42 (m, 16H, -N-C=O- $\text{CH}_2$ -), 1.99 (s, 3H, - $\text{CH}_3$ ). HR-MS (ESI) calc. for  $\text{C}_{75}\text{H}_{128}\text{N}_{21}\text{O}_{32}$   $[\text{M}+3\text{H}]^{3+}$  611.6339; found 611.6340. Yield: 90 mg (49 %).

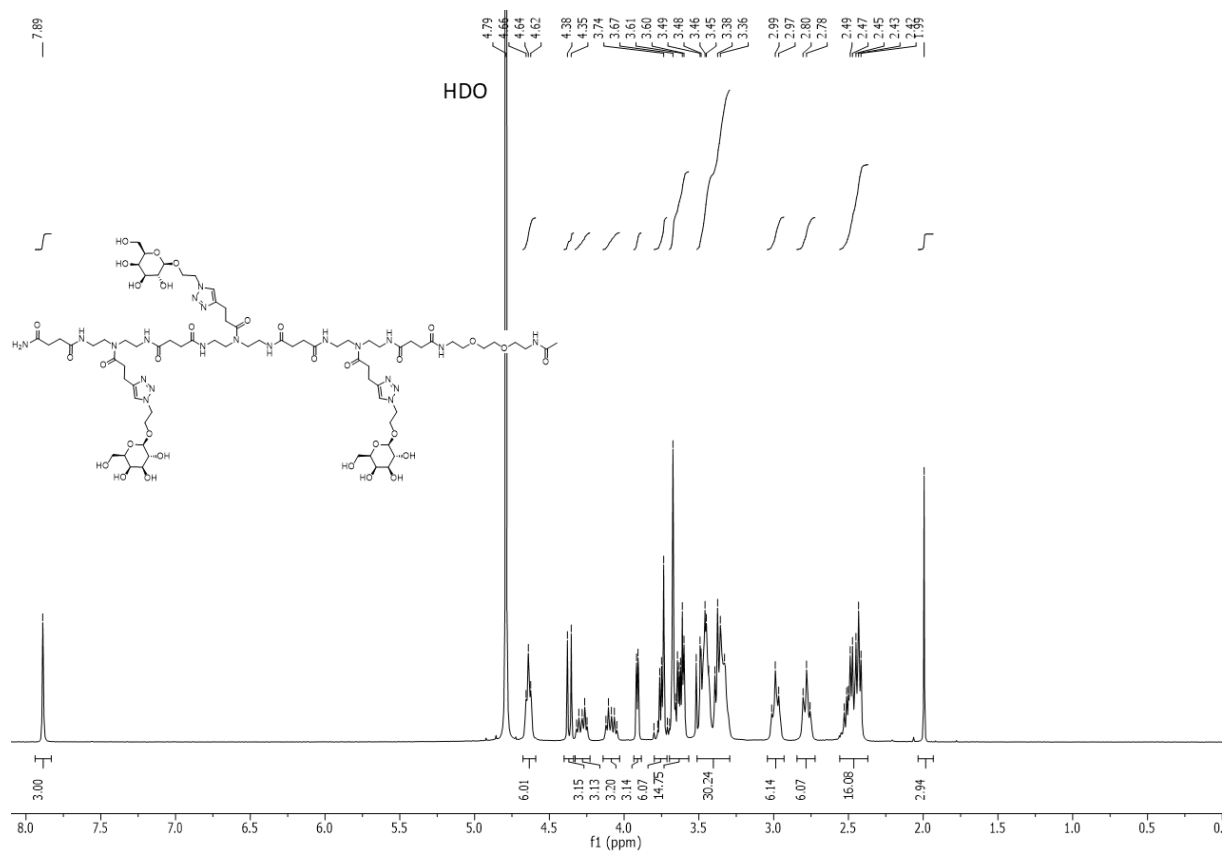

Figure S 17:  $^1\text{H-NMR}$  spectrum of compound 3.

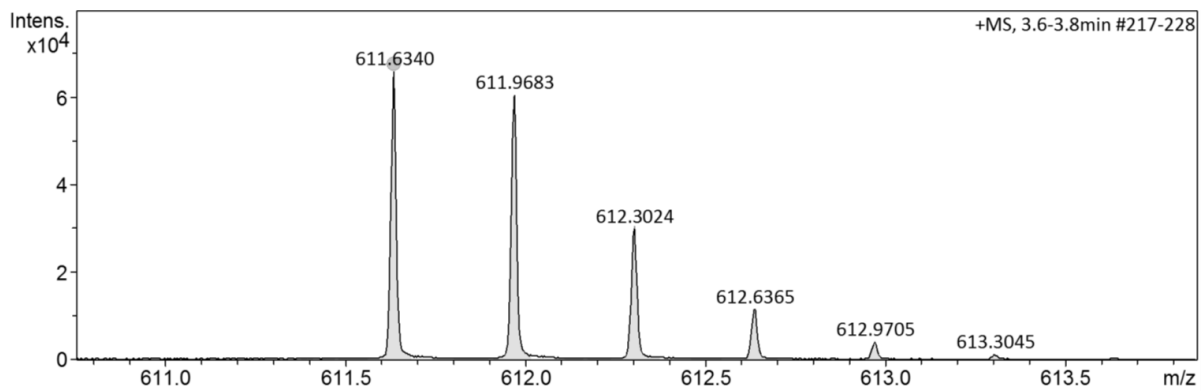

Figure S 18: HR-MS spectrum of compound 3.

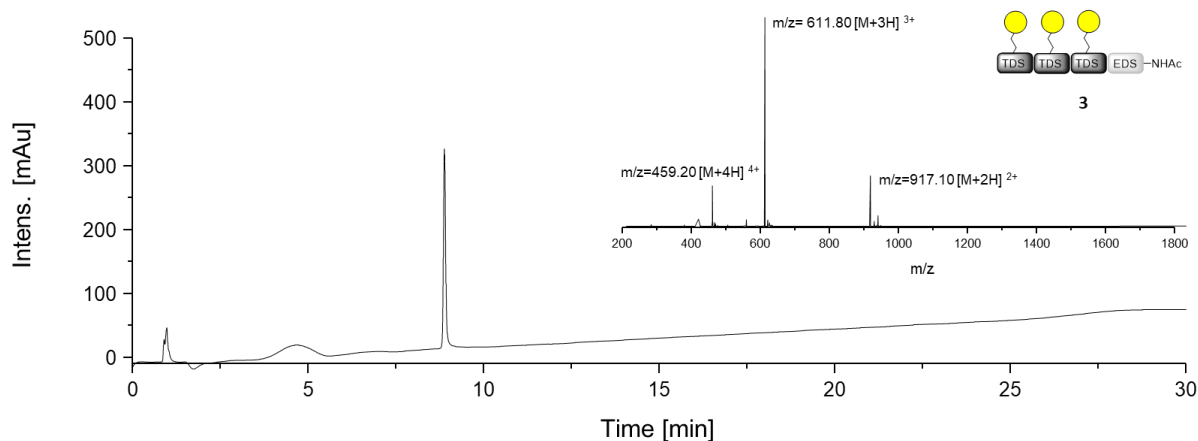

**Figure S 19:** RP-HPLC and ESI-MS spectrum of compound **3**.

### 3.4 Lac(1)-2, **4**

<sup>1</sup>H NMR (300 MHz, Deuterium Oxide)  $\delta$  [ppm]: 8.05 (s, 1 H, triazole-CH), 5.75 (d,  $J = 9.2$  Hz, 1H,  $CH_{anomerGlc}$ ), 4.52 (d,  $J = 7.7$  Hz, 1H,  $CH_{pyranose, O-CH_2-}$ ), 4.10 – 3.73 (m, 10H,  $CH_{pyranose, O-CH_2-}$ ), 3.72 – 3.57 (m, 10H, ), 3.47-3.31 (m 12 H, C=ONH- $CH_2$ ), 3.05 (t,  $J = 7.1$  Hz, 2 H, CH=CH- $CH_2$ ), 2.82 (t,  $J = 7.0$  Hz, 2 H, CH=CH- $CH_2-CH_2$ ), 2.58 – 2.43 (m, 8 H, NHC=O- $CH_2$ ), 2.00 (s, 3 H, - $CH_3$ ). HR-MS (ESI) calc. for  $C_{37}H_{65}N_9O_{18}$  [M+2H]<sup>2+</sup> 461.7218; found 461.7217. Yield: 51 mg (55 %).

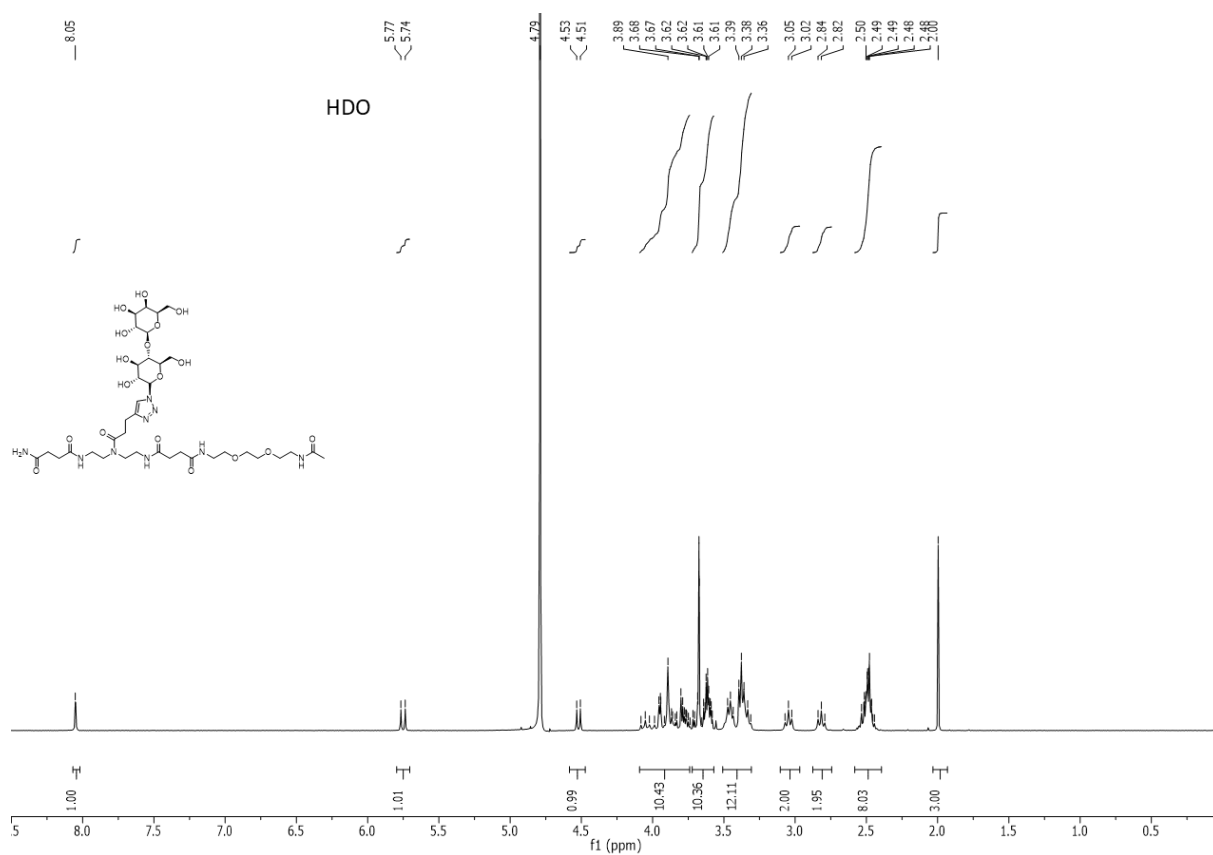

**Figure S 20:** <sup>1</sup>H-NMR spectrum of compound 4.

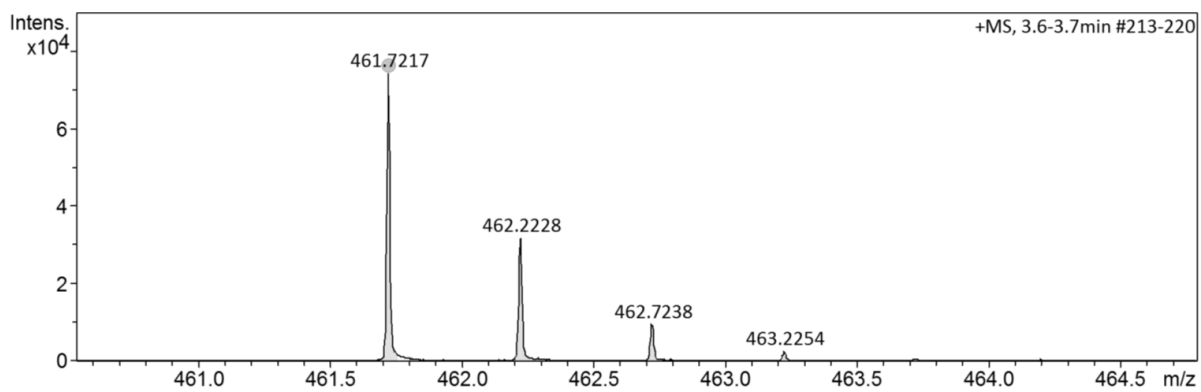

**Figure S 21:** HR-MS spectrum of compound 4.

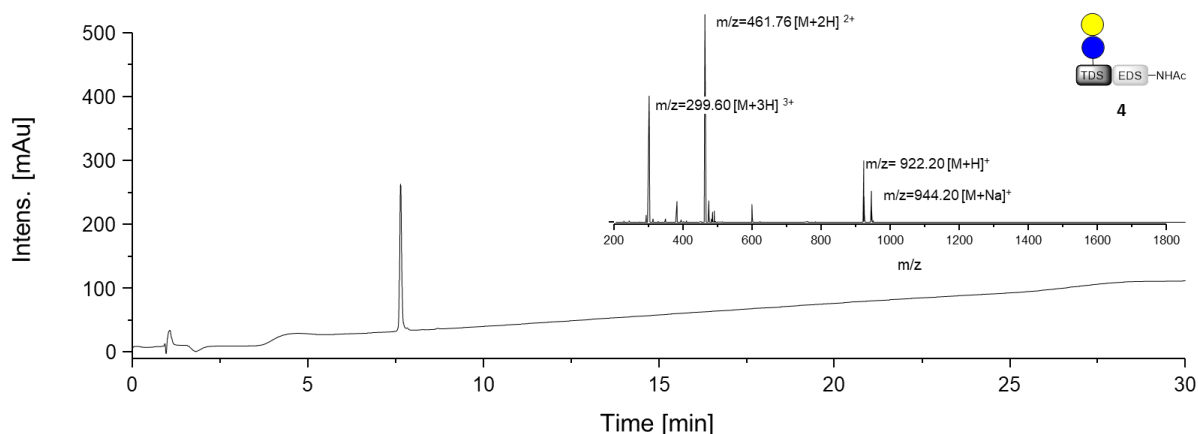

**Figure S 22:** RP-HPLC and ESI-MS spectrum of compound **4**.

### 3.5 Lac(1)-2, **4**\*

$^1\text{H-NMR}$  (600 MHz, Deuterium Oxide)  $\delta$  [ppm]: 8.44 (br s, 1H, NH), 8.03 (m, 1H, triazole-CH), 5.74 (d,  $^3J = 9.3$  Hz, 1H,  $\text{CH}_{\text{anomerGlc}}$ ), 4.50 (d,  $^3J = 7.8$  Hz, 1H,  $\text{CH}_{\text{anomer-Gal}}$ ), 4.03 (t,  $^3J = 9.0$  Hz, 1H,  $\text{CH}_{\text{pyranose}}$ ), 3.97 – 3.55 (m, 19H, O- $\text{CH}_2$ -,  $\text{CH}_{\text{pyranose}}$ ), 3.45 (m, 4H, C=ONH- $\text{CH}_2$ ), 3.36 (m, 4H, C=ONH- $\text{CH}_2$ ), 3.32 (t,  $^3J = 6.1$  Hz, 2H, C=ONH- $\text{CH}_2$ ), 3.20 (m, 2H,  $\text{CH}_2\text{-NH}_2$ ), 3.03 (t,  $^3J = 7.1$  Hz, 2H, CH=CH- $\text{CH}_2$ ), 2.80 (t,  $^3J = 7.2$  Hz, 2H, CH=CH- $\text{CH}_2\text{-CH}_2$ ), 2.47 (m, 8H, NHC=O- $\text{CH}_2$ ). HR-MS (ESI) calc. for  $\text{C}_{35}\text{H}_{63}\text{N}_9\text{O}_{17}$   $[\text{M}+2\text{H}]^{2+}$  440.72; found 440.72. Yield: 48 mg (54 %).



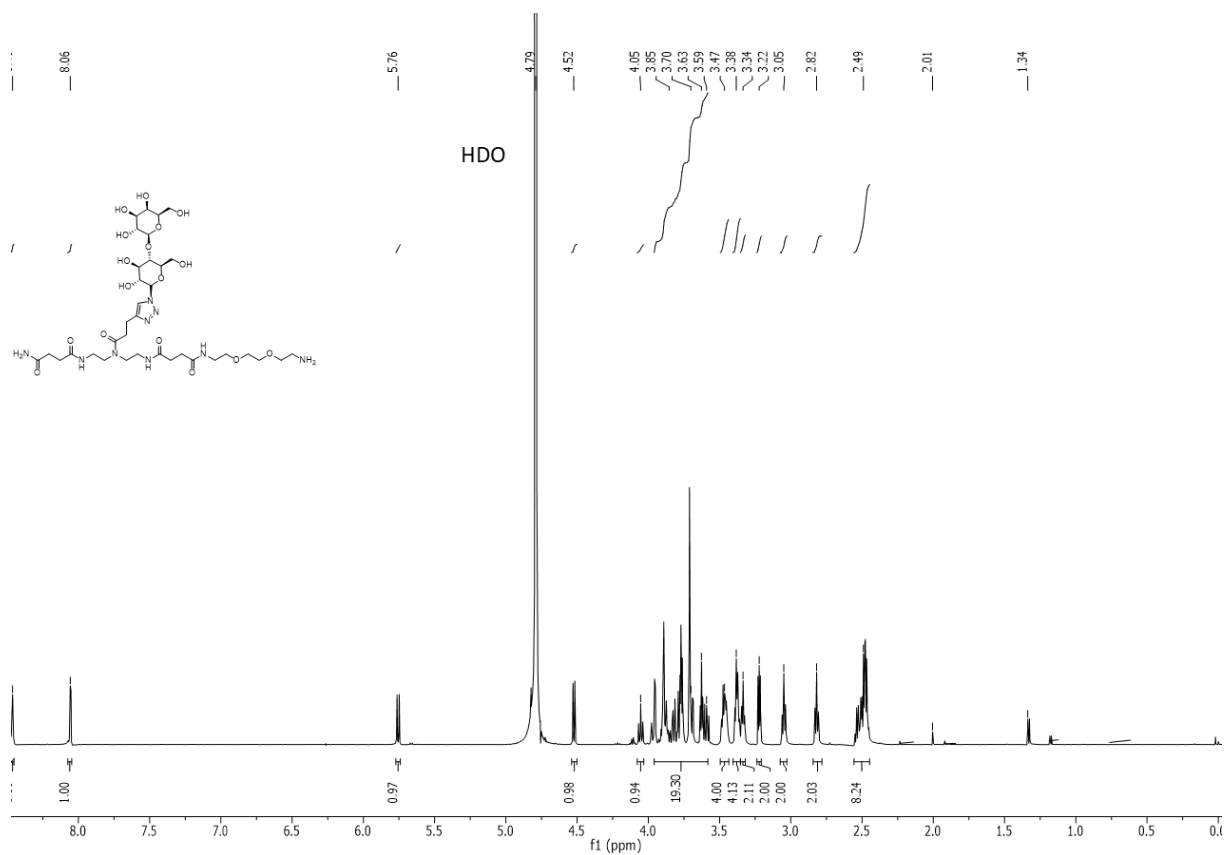

Figure S 23: <sup>1</sup>H-NMR spectrum of compound 4\*.

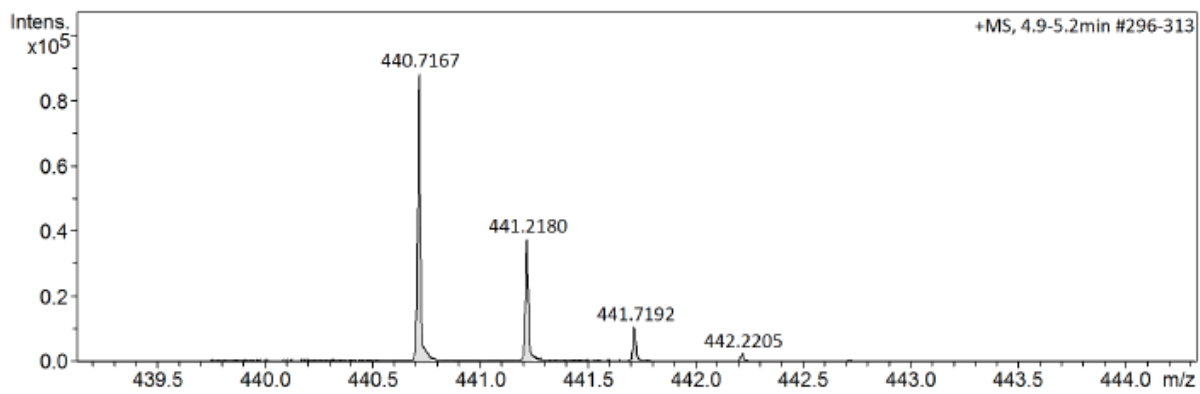

Figure S 24: HR-MS spectrum of compound 4\*.

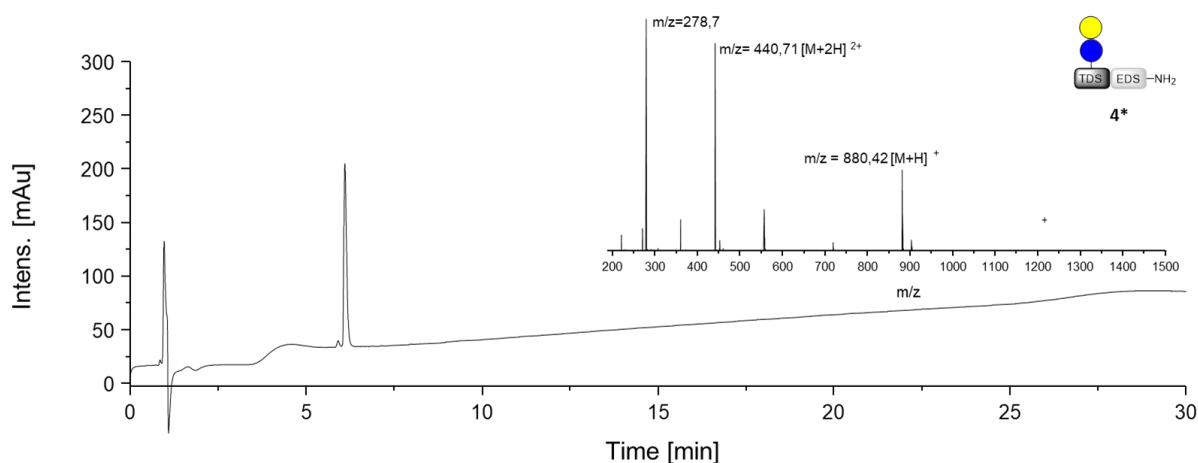

**Figure S 25:**RP-HPLC and ESI-MS spectrum of compound 4\*.

### 3.6 Lac(2)-3, 5

<sup>1</sup>H-NMR (300 MHz, Deuterium Oxide)  $\delta$  [ppm]: 8.05 (s, 1H, triazole-CH); 5.75 (d, <sup>3</sup>J = 9.2 Hz, 1H, CH<sub>anomer</sub>Glc), 4.52 (d, <sup>3</sup>J = 7.7 Hz, 1H, CH<sub>anomer</sub>-Gal), 4.09-3.92 (m, 3H, CH<sub>pyranose</sub>), 3.93-3.82 (m, 4H, CH<sub>pyranose</sub>), 3.81-3.73 (m, 3H, CH<sub>pyranose</sub>), 3.72-3.54 (m, 18H, CH<sub>pyranose</sub>, CH<sub>2</sub> pyranose, O-CH<sub>2</sub>-), 3.51-3.28 (m, 16H, CH<sub>pyranose</sub>, C=ONH-CH<sub>2</sub>), 3.04 (t, <sup>3</sup>J = 7.1 Hz, 2H, CH=CH-CH<sub>2</sub>), 2.81 (t, <sup>3</sup>J = 7.1 Hz, 2H, CH=CH-CH<sub>2</sub>-CH<sub>2</sub>), 2.57-2.45 (m, 12H, NHC=O-CH<sub>2</sub>), 1.99 (s, 3H, CH<sub>3</sub>). HR-MS (ESI): m/z calc. for C<sub>47</sub>H<sub>83</sub>N<sub>11</sub>O<sub>22</sub> [M+2H]<sup>2+</sup> 576.7852; found 576.7847. Yield: 267.1 mg (66 %).

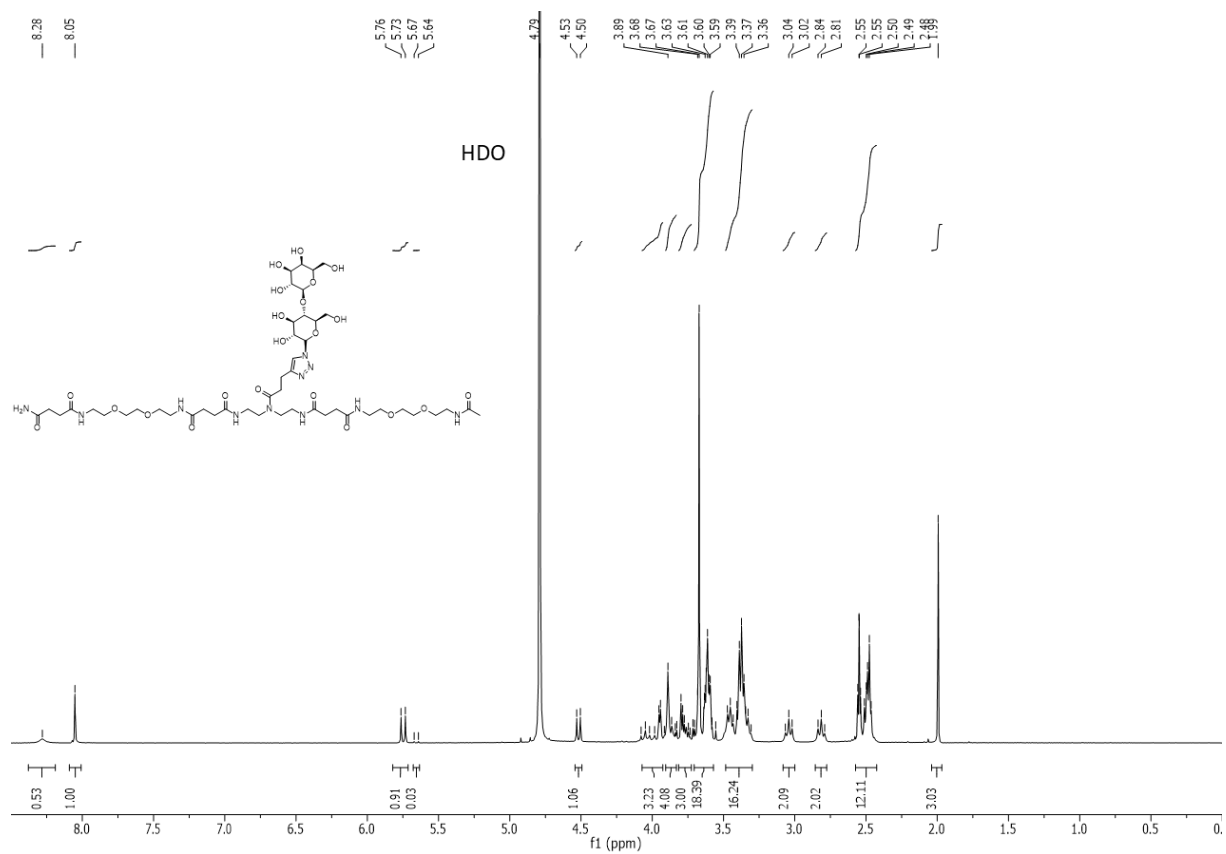

**Figure S 26:  $^1\text{H-NMR}$  spectrum of compound 5.**

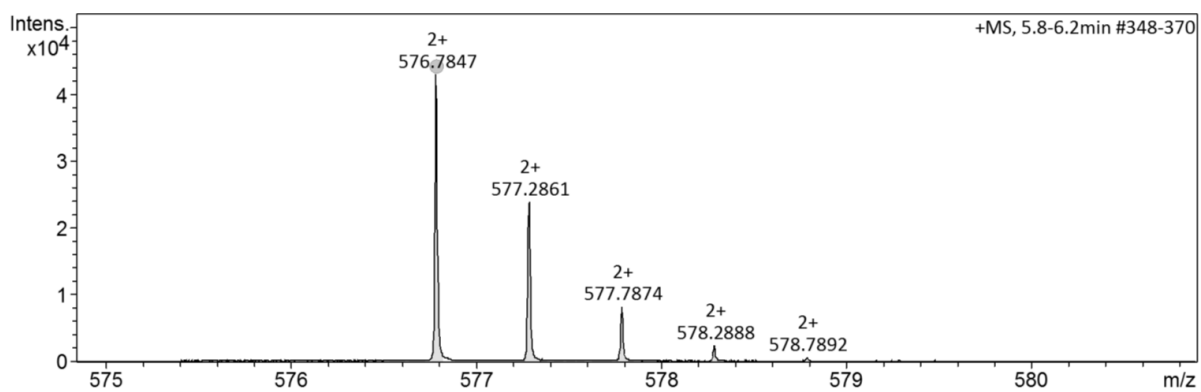

**Figure S 27: HR-MS spectrum of compound 5.**

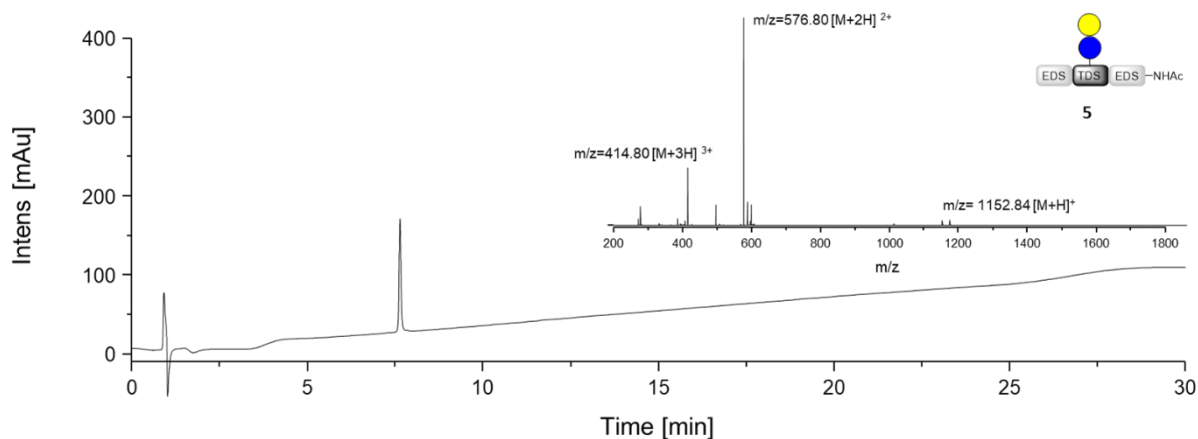

**Figure S 28:** RP-HPLC and ESI-MS spectrum of compound **5**.

### 3.7 Lac(1,5)-5, **6**

$^1\text{H-NMR}$  (300 MHz, Deuterium Oxide)  $\delta$  [ppm]: 8.05 (s, 2H, triazole-CH), 5.75 (d, 2H,  $^3\text{J} = 9.1$  Hz,  $\text{CH}_{\text{anomerGlc}}$ ), 4.52 (d,  $^3\text{J} = 7.7$  Hz, 2H,  $\text{CH}_{\text{anomer-Gal}}$ ), 4.10-3.73 (m, 18H,  $\text{CH}_{\text{pyranose}}$ ), 3.72-3.54 (m, 30H,  $\text{CH}_{\text{pyranose}}$ ,  $\text{CH}_2$  pyranose, O- $\text{CH}_2$ -), 3.51-3.29 (m, 28H,  $\text{CH}_{\text{pyranose}}$  C=ONH- $\text{CH}_2$ ), 3.04 (t,  $^3\text{J} = 7.1$  Hz, 4H, CH=CH- $\text{CH}_2$ ), 2.81 (t,  $^3\text{J} = 6.5$  Hz, 4H, CH=CH- $\text{CH}_2$ - $\text{CH}_2$ ), 2.56-2.44 (m, 20H, NHC=O- $\text{CH}_2$ ), 1.94 (s, 1,5H,  $\text{CH}_3$ ), 1.92 (s, 1,5H,  $\text{CH}_3$ ). HR-MS (ESI): m/z calc. for  $\text{C}_{82}\text{H}_{142}\text{N}_{19}\text{O}_{39}$   $[\text{M}+3\text{H}]^{3+}$  672.3232; found: 672.3225. Yield: 145.0 mg (28 %).

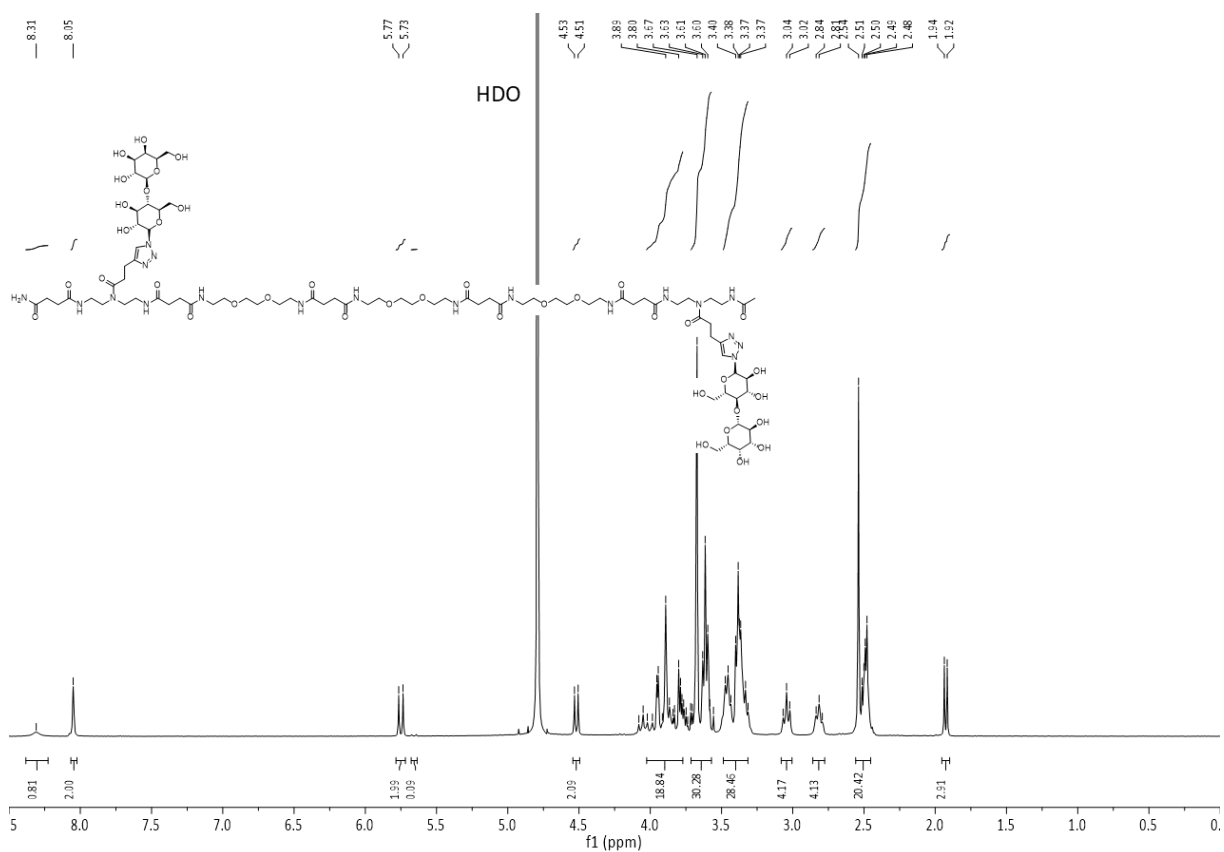

Figure S 29:  $^1\text{H-NMR}$  spectrum of compound 6.

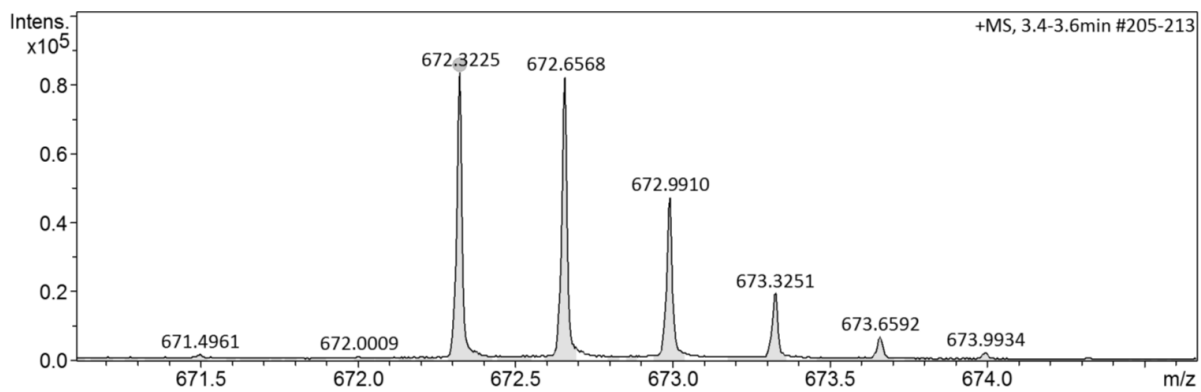

Figure S 30: HR-MS spectrum of compound 6.

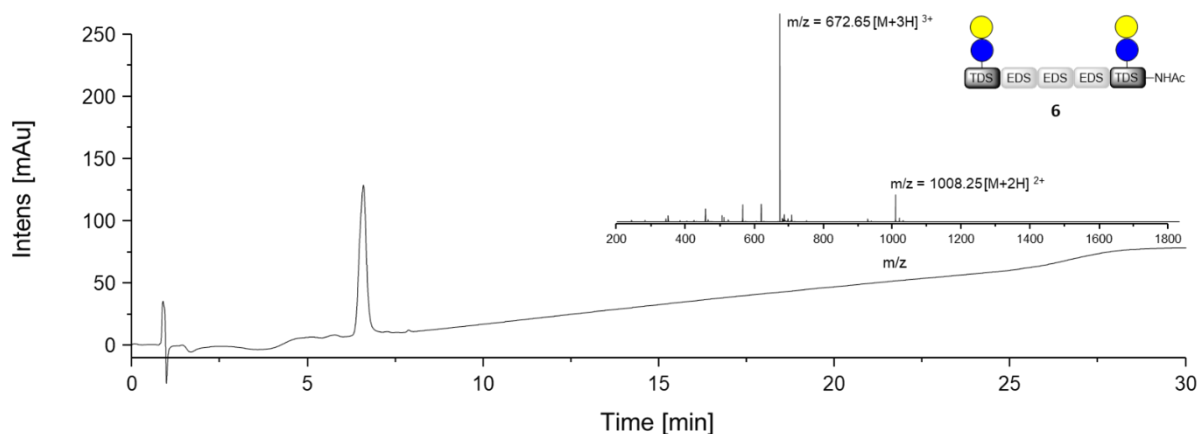

**Figure S 31:** RP-HPLC and ESI-MS spectrum of compound **6**.

### 3.8 Lac(1,5,9)-9, **7**

$^1\text{H-NMR}$  (300 MHz, Deuterium Oxide)  $\delta$  [ppm]: 8.05 (s, 3H, triazole-CH), 5.75 (d,  $^3\text{J} = 9.2$  Hz, 3H,  $\text{CH}_{\text{anomerGlc}}$ ), 4.52 (d, 3H,  $3\text{J} = 7.7$  Hz,  $\text{CH}_{\text{anomerGal}}$ ), 4.10-3.92 (m, 8H,  $\text{CH}_{\text{pyranose}}$ ), 3.92-3.82 (m, 14 H,  $\text{CH}_{\text{pyranose}}$ ), 3.82-3.73 (m, 6H,  $\text{CH}_{\text{pyranose}}$ ), 3.72-3.55 (m, 54H,  $\text{CH}_{\text{pyranose}}$ ,  $\text{CH}_2$  pyranose, O- $\text{CH}_2$ -), 3.51-3.28 (m, 50H,  $\text{CH}_{\text{pyranose}}$ , C=ONH- $\text{CH}_2$ ), 3.04 (t,  $^3\text{J} = 7.0$  Hz, 6H, CH=CH- $\text{CH}_2$ ), 2.81 (t,  $^3\text{J} = 7.0$  Hz, 6H, CH=CH- $\text{CH}_2$ - $\text{CH}_2$ ), 2.57-2.42 (m, 36H, NHC=O- $\text{CH}_2$ ), 1.94 (s, 1,5H,  $\text{CH}_3$ ), 1.92 (s, 1,5H,  $\text{CH}_3$ ). HR-MS (ESI): m/z calc. for  $\text{C}_{137}\text{H}_{237}\text{N}_{31}\text{O}_{64}$   $[\text{M}+4\text{H}]^{4+}$  835.1555; found 835.1562. Yield: 76 mg (32 %).

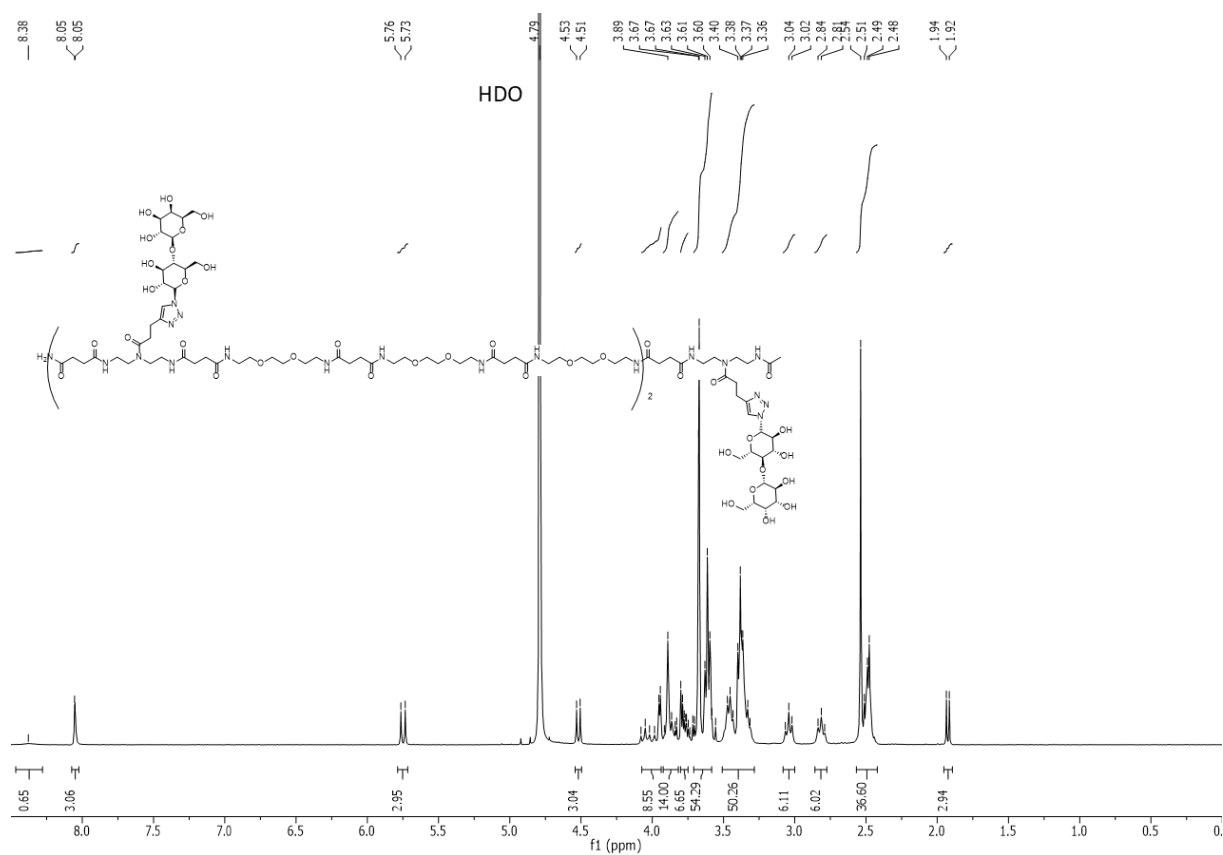

**Figure S 32:**  $^1\text{H-NMR}$  spectrum of compound 7.

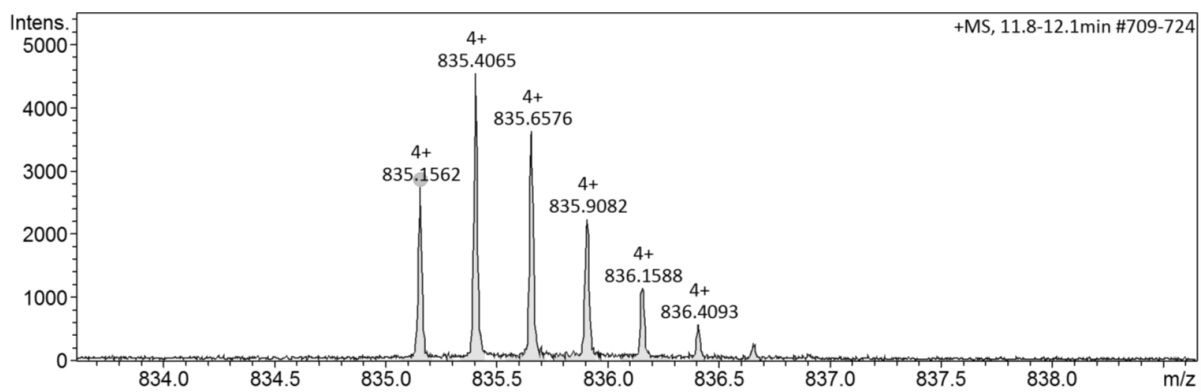

**Figure S 33:** HR-MS spectrum of compound 7.

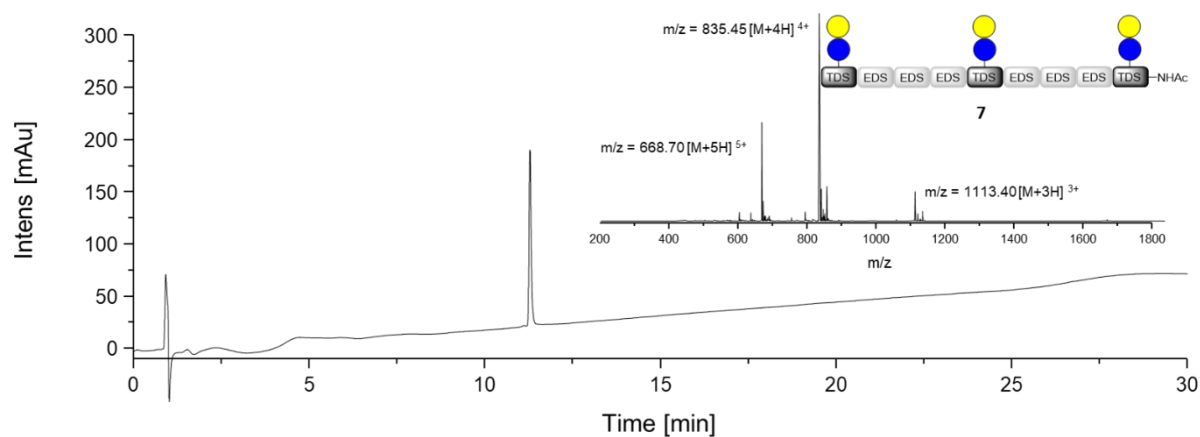

**Figure S 34:** RP-HPLC and ESI-MS spectrum of compound **7**.

### 3.9 Lac(1,4,7)-8, **8**

$^1\text{H-NMR}$  (300 MHz Deuterium Oxide)  $\delta$  [ppm]: 8.05 (s, 3H, triazole-CH), 5.75 (d,  $^3\text{J} = 9.2$  Hz, 3H,  $\text{CH}_{\text{anomerGlc}}$ ), 4.52 (d,  $^3\text{J} = 7.6$  Hz, 3H,  $\text{CH}_{\text{anomerGal}}$ ), 4.11 – 3.53 (m, 77H,  $\text{CH}_{\text{pyranose}}$ ,  $\text{CH}_2$  pyranose, O- $\text{CH}_2$ -), 3.53 – 3.24 (m, 43H,  $\text{CH}_{\text{pyranose}}$ ,  $\text{CH}_2$  pyranose, C=ONH- $\text{CH}_2$ ), 3.04 (t,  $^3\text{J} = 7.1$  Hz, 6H, CH=CH- $\text{CH}_2$ ), 2.81 (t,  $^3\text{J} = 7.1$  Hz, 6H, CH=CH- $\text{CH}_2$ - $\text{CH}_2$ ), 2.59 – 2.38 (m, 32H, NHC=O- $\text{CH}_2$ ), 1.99 (s, 3H,  $\text{CH}_3$ ). HR-MS (ESI) calc. for  $\text{C}_{127}\text{H}_{219}\text{N}_{29}\text{O}_{60}$   $[\text{M}+4\text{H}]^{4+}$  777.6239; found 777.6229. Yield: 107 mg (35 %).



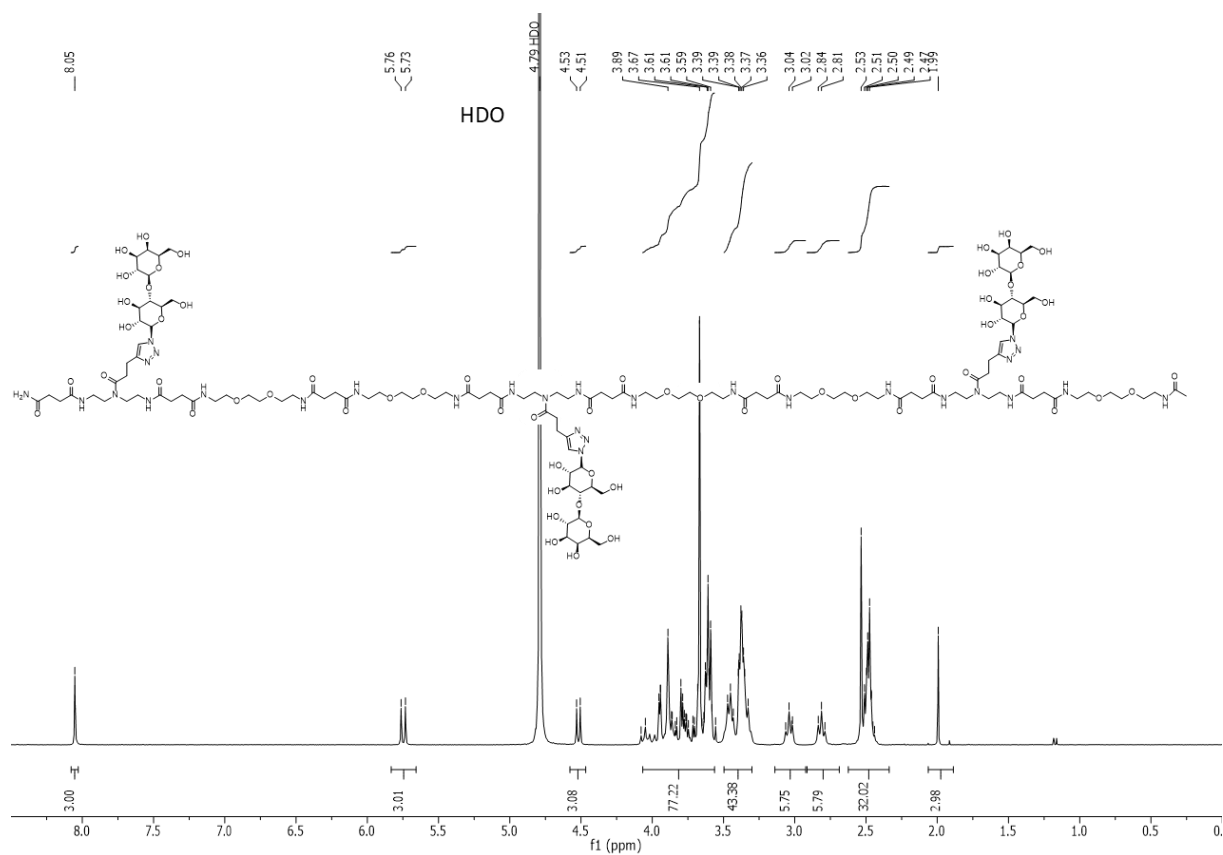

**Figure S 35: <sup>1</sup>H-NMR spectrum of compound 8.**

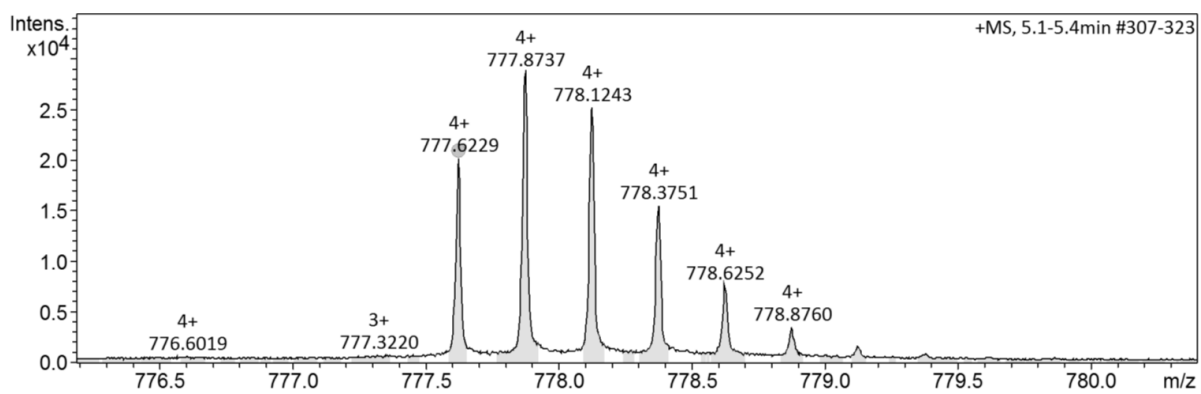

**Figure S 36: HR-MS spectrum of compound 8.**

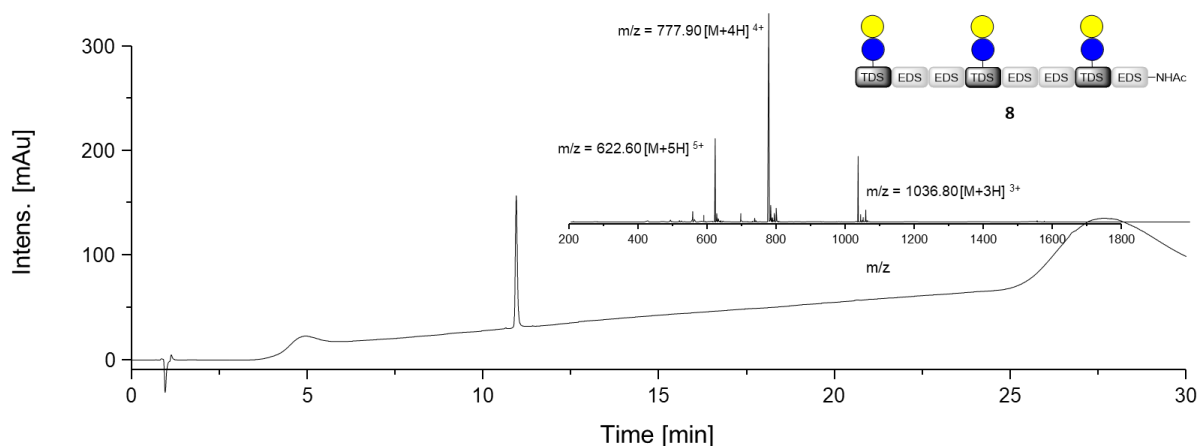

**Figure S 37:** RP-HPLC and ESI-MS spectrum of compound **8**.

### 3.10 Lac(1,3,5)-6, **9**

<sup>1</sup>H-NMR (300 MHz, Deuterium Oxide)  $\delta$  [ppm]: 8.05 (s, 3H, triazole-CH), 5.75 (d, <sup>3</sup>J = 9.2 Hz, 3H, CH<sub>anomer</sub>Glc), 4.52 (d, <sup>3</sup>J = 7.7 Hz, 3H, CH<sub>anomer</sub>-Gal), 4.09 – 3.73 (m, 30H, CH<sub>pyranose</sub>, CH<sub>2</sub> pyranose, O-CH<sub>2</sub>-), 3.73 – 3.55 (m, 30H, CH<sub>pyranose</sub>, CH<sub>2</sub> pyranose, O-CH<sub>2</sub>-), 3.53 – 3.26 (m, 36H, CH<sub>pyranose</sub>, C=ONH-CH<sub>2</sub>), 3.04 (t, <sup>3</sup>J = 7.1 Hz, 6H, CH=CH-CH<sub>2</sub>), 2.81 (t, <sup>3</sup>J = 7.1 Hz, 6H, CH=CH-CH<sub>2</sub>-CH<sub>2</sub>), 2.60 – 2.38 (m, 24H, NHC=O-CH<sub>2</sub>), 1.99 (s, 3H, CH<sub>3</sub>). HR-MS (ESI) calc. for C<sub>107</sub>H<sub>182</sub>N<sub>25</sub>O<sub>52</sub> [M+3H]<sup>3+</sup> 883.0783; found: 883.0787. Yield: 109 mg (41 %).

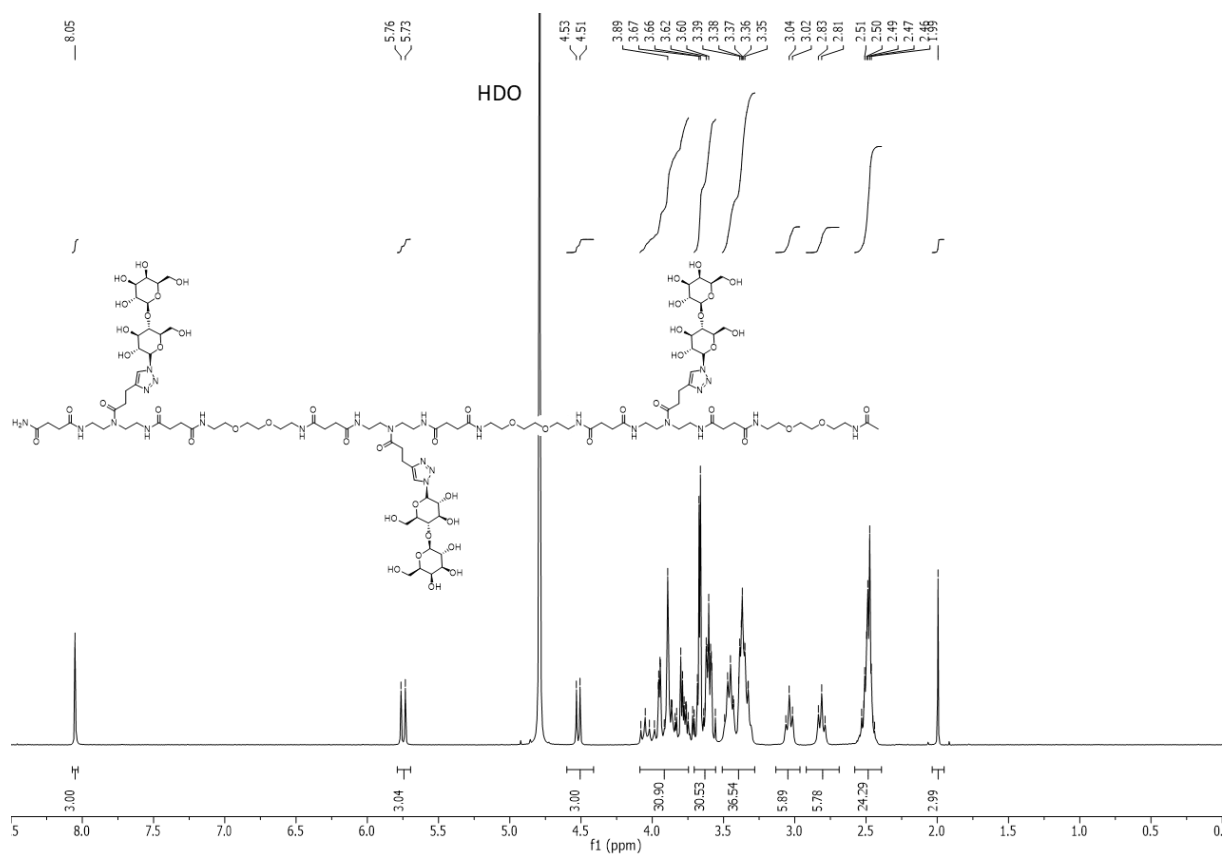

**Figure S 38: <sup>1</sup>H-NMR spectrum of compound 9.**

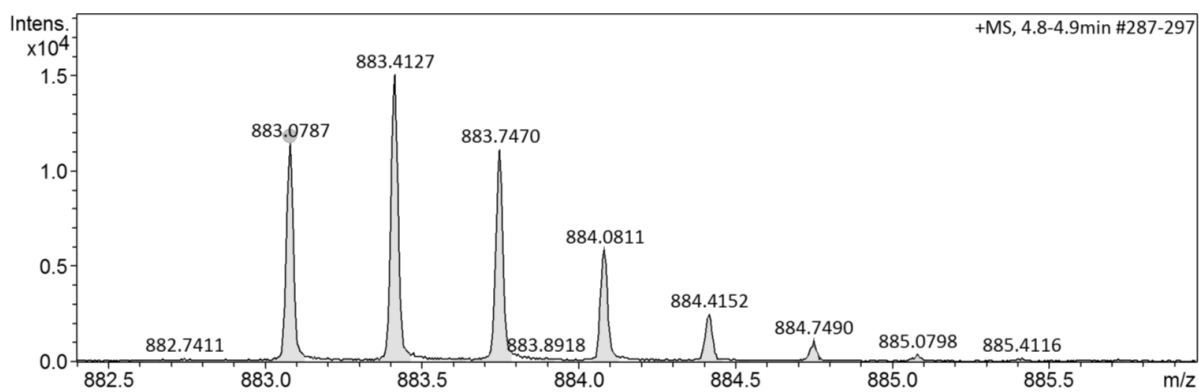

**Figure S 39: HR-MS spectrum of compound 9.**

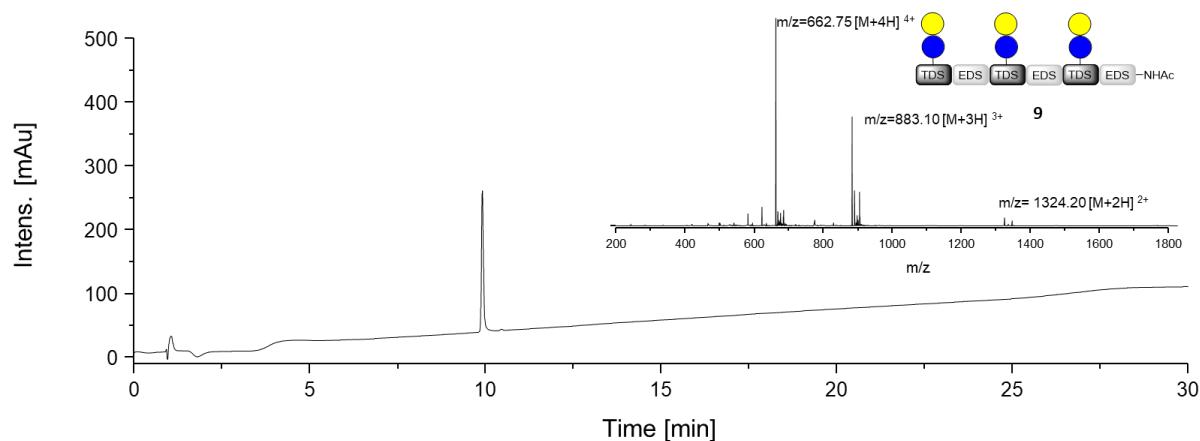

**Figure S 40:** RP-HPLC and ESI-MS spectrum of compound **9**.

### 3.11 Lac(1,3,5)-6, **9**\*

$^1\text{H-NMR}$  (600 MHz, Deuterium Oxide)  $\delta$  [ppm]: 8.43 (br s, 2 H, NH), 8.03 (m, 3H, triazole-CH), 5.73 (m, 3H,  $\text{CH}_{\text{anomerGlc}}$ ), 4.50 (d,  $^3J = 7.8$  Hz, 3H,  $\text{CH}_{\text{anomerGal}}$ ), 4.03 (t,  $^3J = 9.1$  Hz, 3H,  $\text{CH}_{\text{pyranose}}$ ), 3.99 – 3.55 (m, 57H,  $\text{CH}_{\text{pyranose}}$ ,  $\text{CH}_2$  pyranose, O- $\text{CH}_2$ -), 3.44 (m, 12 H, C=ONH- $\text{CH}_2$ ), 3.33 (m, 22H,  $\text{CH}_{\text{pyranose}}$ , C=ONH- $\text{CH}_2$ ), 3.20 (t,  $^3J = 5.1$  Hz, 2 H,  $\text{CH}_2\text{-NH}_2$ ), 3.02 (m, 6H, CH=CH- $\text{CH}_2$ ), 2.79 (m, 6H, CH=CH- $\text{CH}_2\text{-CH}_2$ ), 2.47 (m, 24 H, NHC=O- $\text{CH}_2$ ). HR-MS (ESI) calc. for  $\text{C}_{105}\text{H}_{180}\text{N}_{25}\text{O}_{51}$   $[\text{M}+3\text{H}]^{3+}$  869.07; found: 869.08. Yield: 103 mg (40 %).

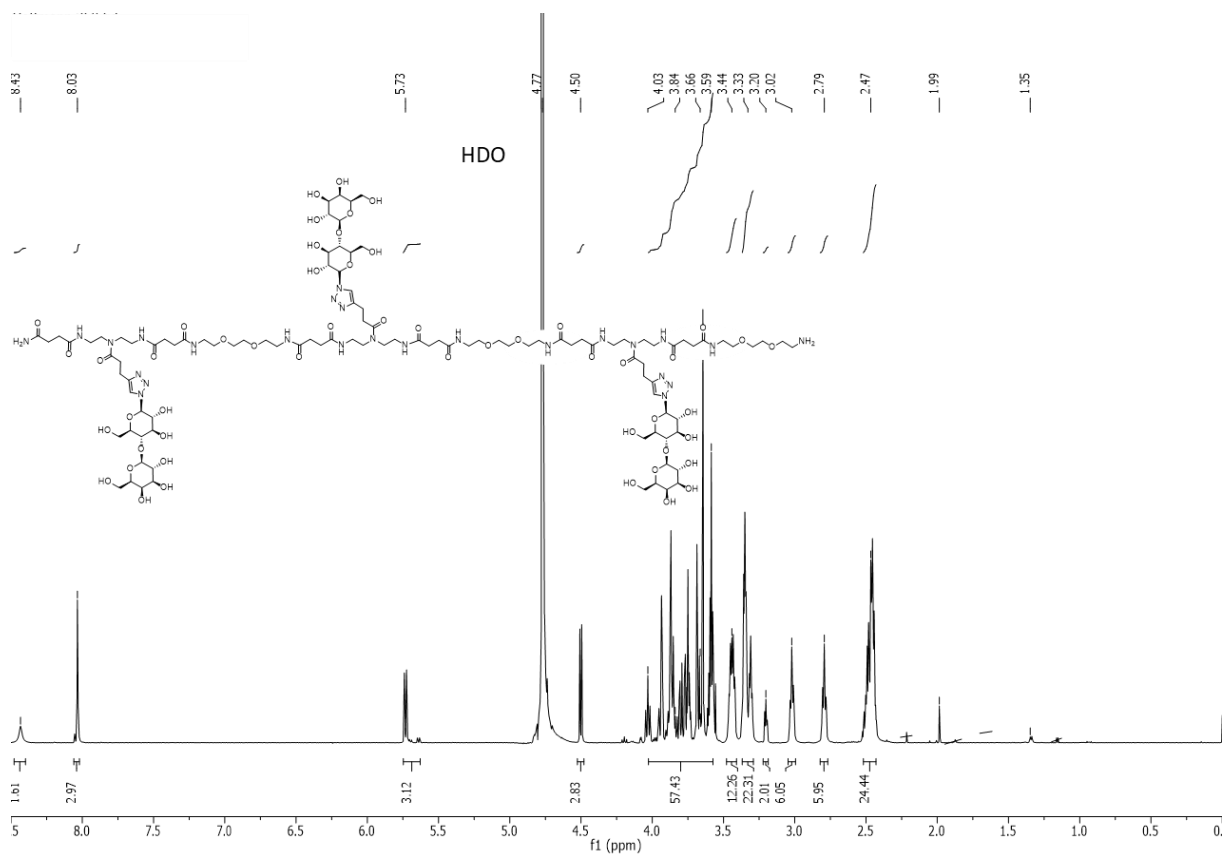

Figure S 41:  $^1\text{H-NMR}$  spectrum of compound Lac(1,3,5)-6, **9\***.

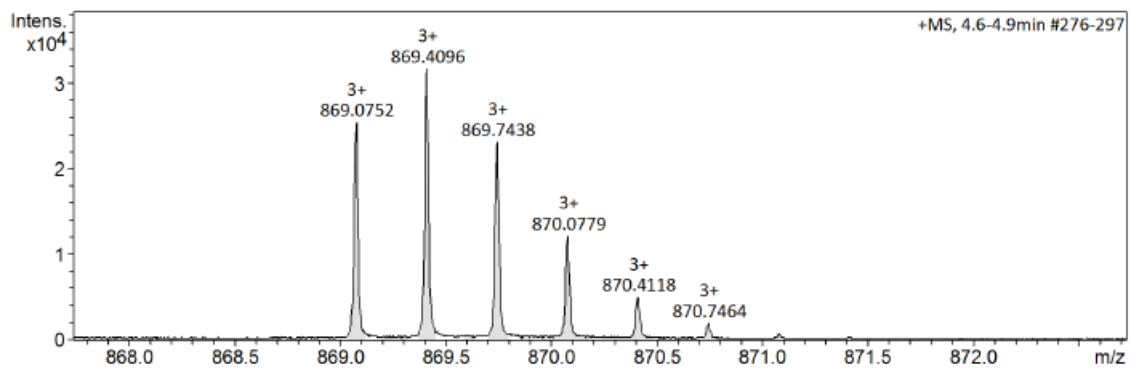

Figure S 42: HR-MS spectrum of compound **9\***.

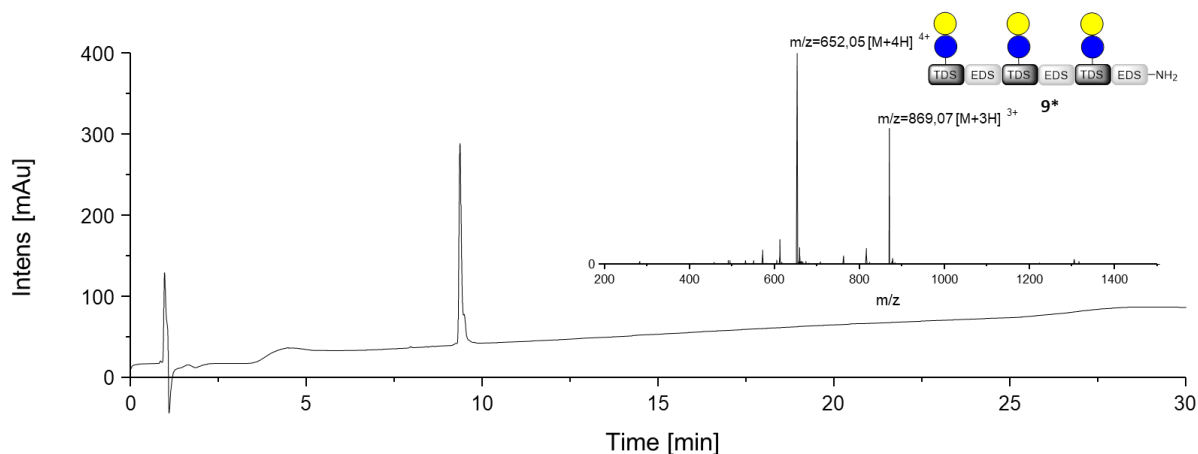

**Figure S 43:** RP-HPLC and ESI-MS spectrum of compound **9\***.

### 3.12 Lac(1,2,3)-4, **10**

$^1\text{H-NMR}$  (300 MHz, Deuterium Oxide)  $\delta$  [ppm]: 8.12 – 7.97 (m, 3H, triazole-CH), 5.74 (d,  $^3\text{J} = 9.2$  Hz, 3H,  $\text{CH}_{\text{anomerGlc}}$ ), 4.52 (d,  $^3\text{J} = 7.6$  Hz, 3H,  $\text{CH}_{\text{anomerGal}}$ ), 4.10 – 3.53 (m, 44H,  $\text{CH}_{\text{pyranose}}$ ,  $\text{CH}_2_{\text{pyranose}}$ , O- $\text{CH}_2$ -), 3.53 – 3.25 (m, 28H,  $\text{CH}_{\text{pyranose}}$ , C=ONH- $\text{CH}_2$ ), 3.12 – 2.93 (m, 6H, CH=CH- $\text{CH}_2$ ), 2.88 – 2.70 (m, 6H, CH=CH- $\text{CH}_2$ - $\text{CH}_2$ ), 2.57 – 2.35 (m, 16H, NHC=O- $\text{CH}_2$ ), 1.99 (s, 3H,  $\text{CH}_3$ ). HR-MS (ESI) calc. for  $\text{C}_{87}\text{H}_{146}\text{N}_{21}\text{O}_{44}$   $[\text{M}+3\text{H}]^{3+}$  729.6605; found 729.6606. Yield: 121 mg (55 %).

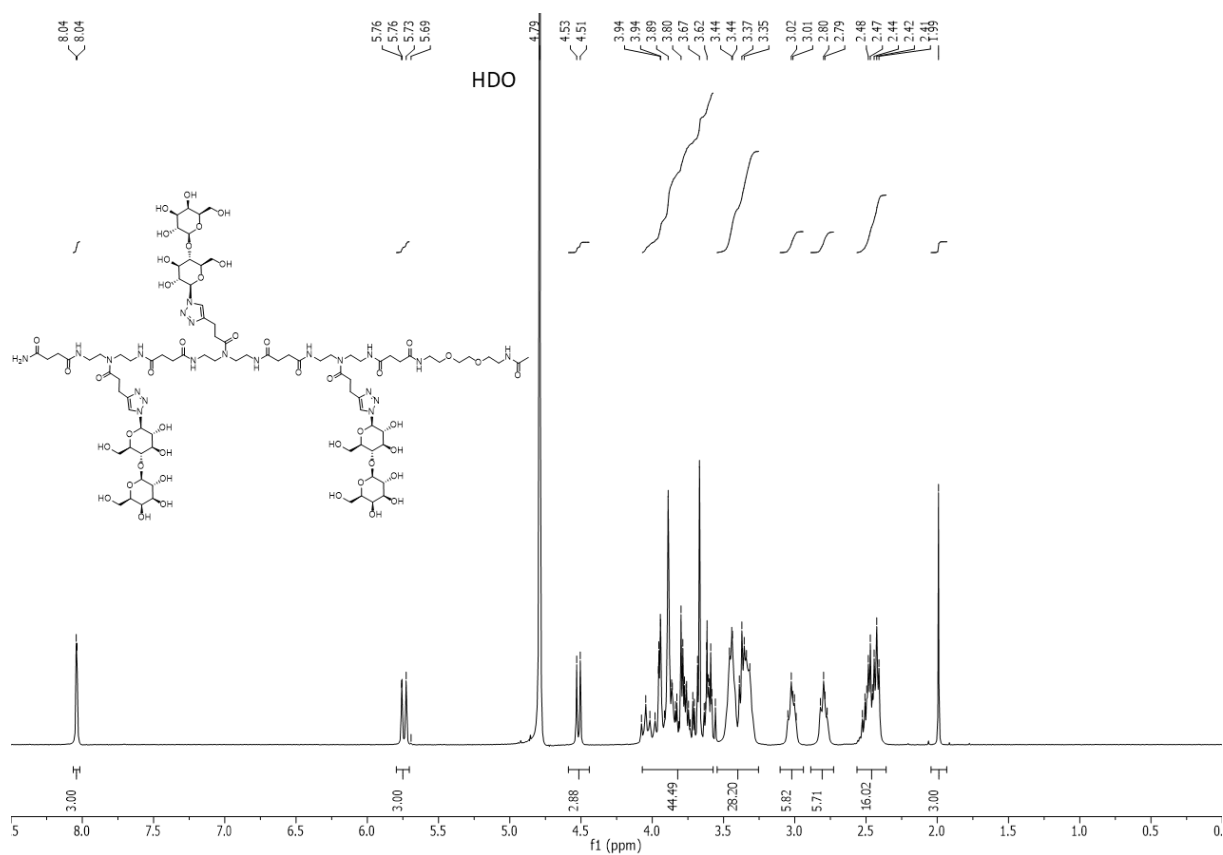

**Figure S 44:**  $^1\text{H-NMR}$  spectrum of compound **10**.

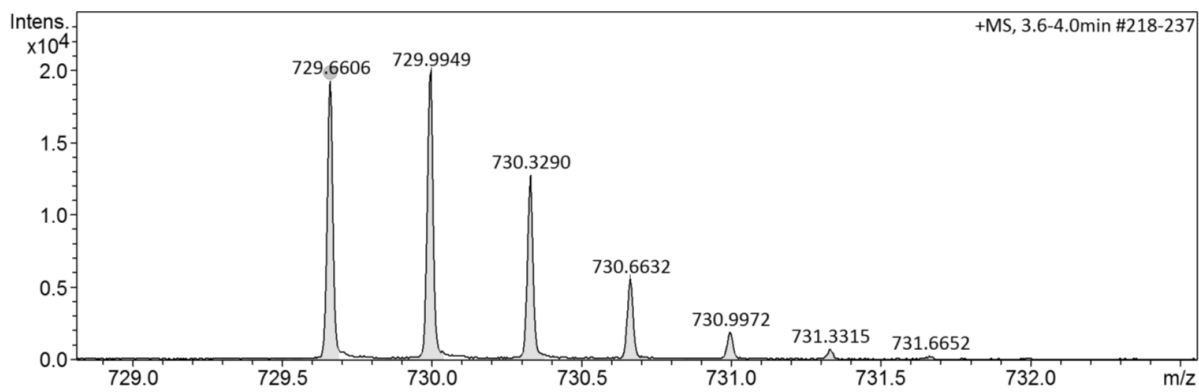

**Figure S 45:** HR-MS spectrum of compound **10**.

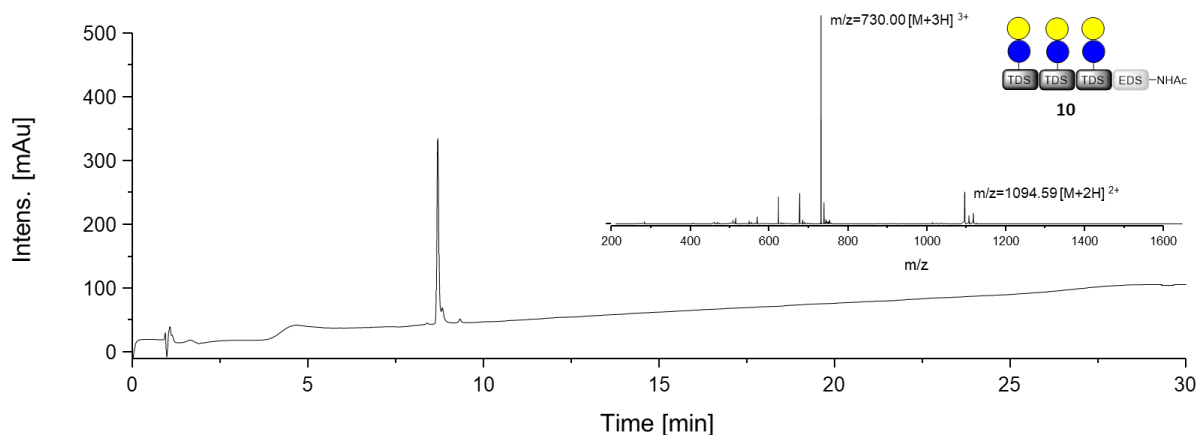

**Figure S 46:** RP-HPLC and ESI-MS spectrum of compound **10**.

### 3.13 Lac(1,2,3)-4, **10**\*

$^1\text{H-NMR}$  (600 MHz, Deuterium Oxide)  $\delta$  [ppm]: 8.45 (br s, 1H, NH), 8.02 (m, 3H, triazole-CH), 5.74 (m, 3H,  $\text{CH}_{\text{anomerGlc}}$ ), 4.50 (d,  $^3J = 7.8$  Hz, 3H,  $\text{CH}_{\text{anomerGal}}$ ), 4.03 (m, 3 H,  $\text{CH}_{\text{pyranose}}$ ), 3.96 – 3.55 (m, 41H,  $\text{CH}_{\text{pyranose}}$ ,  $\text{CH}_2$  pyranose, O- $\text{CH}_2$ -), 3.43 (m, 12H, C=ONH- $\text{CH}_2$ ), 3.33 (m, 14H, C=ONH- $\text{CH}_2$ ), 3.20 (m, 2H,  $\text{CH}_2\text{-NH}_2$ ), 3.01 (m, 6H, CH=CH- $\text{CH}_2$ ), 2.78 (m, 6H, CH=CH- $\text{CH}_2\text{-CH}_2$ ), 2.45 (m, 16H, NHC=O- $\text{CH}_2$ ). HR-MS calc. for  $\text{C}_{85}\text{H}_{144}\text{N}_{21}\text{O}_{43}$   $[\text{M}+3\text{H}]^{3+}$  715.66; found: 715.66. Yield: 97 mg (45 %).



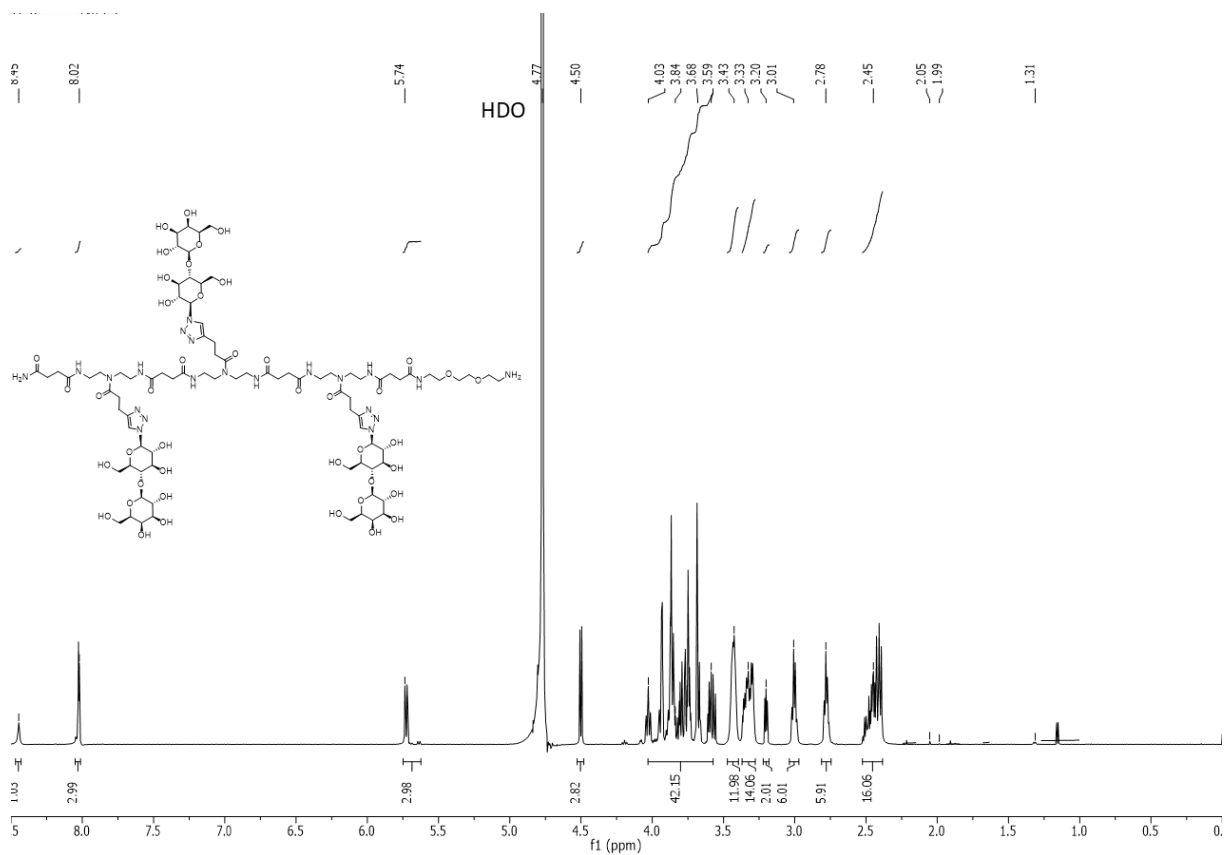

Figure S 47: <sup>1</sup>H-NMR spectrum of compound 10\*.

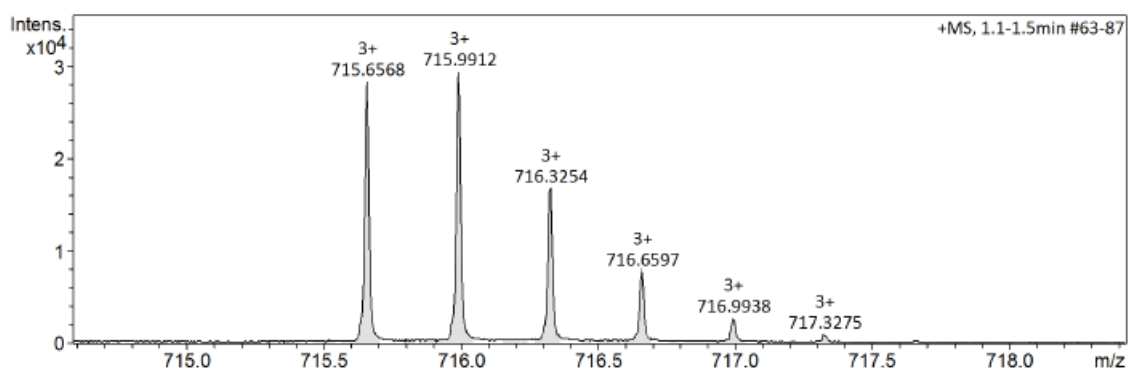

Figure S 48: HR-MS spectrum of compound 10\*.

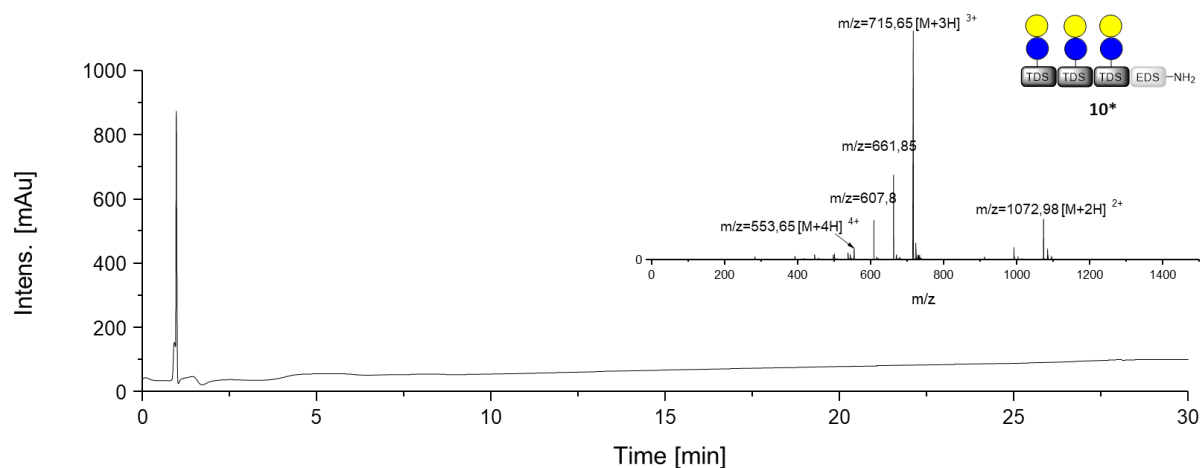

**Figure S 49:** RP-HPLC and ESI-MS spectrum of compound **10\***.

### 3.14 Lac<sub>3</sub>TPD, **11**

<sup>1</sup>H NMR (300 MHz, Deuterium Oxide)  $\delta$  [ppm]: 8.03 (s, 2H, triazole-CH), 8.00 (s, 1H, triazole-CH), 5.77 – 5.68 (m, 3H, CH<sub>anomer</sub>Glc), 4.52 (d, <sup>3</sup>J = 7.7 Hz, 3H, CH<sub>anomer</sub>-Gal), 4.04 (t, <sup>3</sup>J = 8.6 Hz, 3H, CH<sub>pyranose</sub>), 3.99 – 3.73 (m, 27H), 3.69 (dd, <sup>3</sup>J = 10.0, 3.3 Hz, 3H, CH<sub>pyranose</sub>), 3.59 (dd, <sup>3</sup>J = 10.0, 7.6 Hz, 3H, CH<sub>pyranose</sub>), 3.38 – 3.21 (m, 8H, C=ONH-CH<sub>2</sub>), 3.07 – 2.92 (m, 6H, CH=CH-CH<sub>2</sub>), 2.71 (t, <sup>3</sup>J = 7.1 Hz, 2H, CH=CH-CH<sub>2</sub>-CH<sub>2</sub>), 2.65 – 2.51 (m, 4H, CH=CH-CH<sub>2</sub>-CH<sub>2</sub>). HR-MS (ESI) calc. for C<sub>55</sub>H<sub>90</sub>N<sub>12</sub>O<sub>33</sub> [M+2H]<sup>2+</sup> 723.2861; found 723.2859. Yield: 73 mg (50 %).

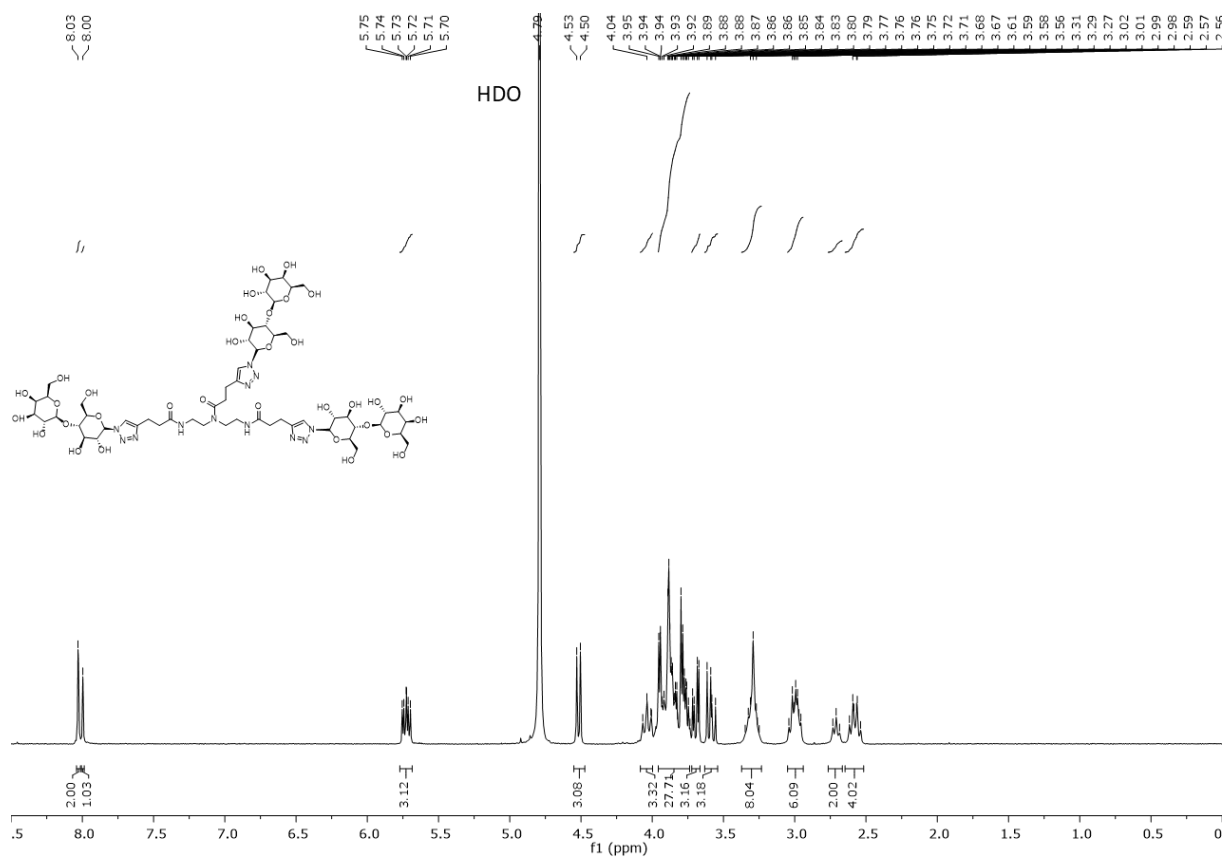

Figure S 50: <sup>1</sup>H-NMR spectrum of compound 11.

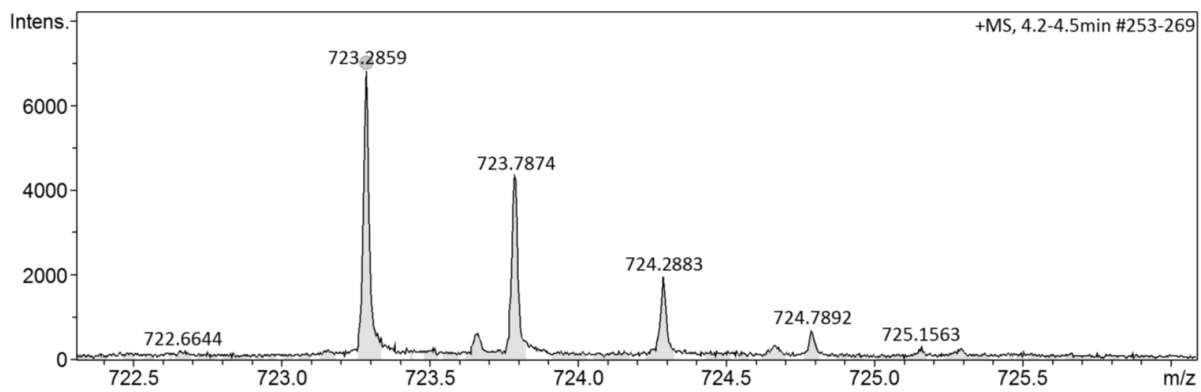

Figure S 51: HR-MS spectrum of compound 11.

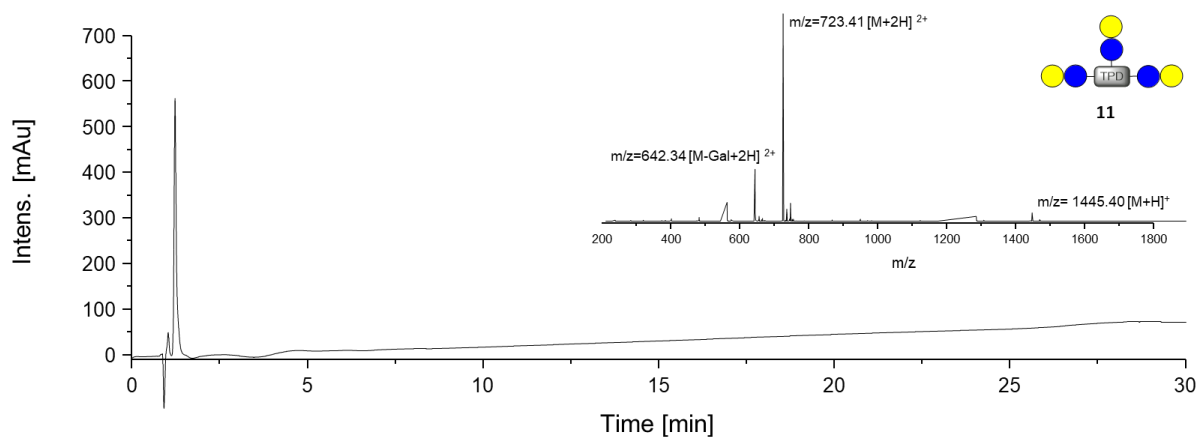

**Figure S 52:** RP-HPLC and ESI spectrum of compound **11**.

### 3.15 Lac(1,2,3,4,5,6)-7, **12**

$^1\text{H-NMR}$  (300 MHz, Deuterium Oxide)  $\delta$  [ppm]: 8.04 (m, 6H, triazole-CH), 5.74 (d,  $J = 9.2$  Hz, 6H,  $\text{CH}_{\text{anomerGlc}}$ ), 4.52 (d,  $J = 7.6$  Hz, 6H,  $\text{CH}_{\text{anomerGal}}$ ), 4.10 – 3.74 (m, 62H,  $\text{CH}_{\text{pyranose, O-CH}_2}$ ), 3.72 – 3.54 (m, 20H,  $\text{CH}_{\text{pyranose, CH}_2 \text{ pyranose, O-CH}_2}$ ), 3.50 – 3.27 (m, 50H,  $\text{C=ONH-CH}_2$ ), 3.04-2.98 (m, 12H,  $\text{CH=CH-CH}_2$ ), 2.85 – 2.72 (m, 12H,  $\text{CH=CH-CH}_2\text{-CH}_2$ ), 2.52-2.41 (m, 28H,  $\text{NHC=O-CH}_2$ ), 1.99 (s, 3H,  $\text{CH}_3$ ). HR-MS (ESI+)  $m/z$  calc. for  $\text{C}_{162}\text{H}_{267}\text{N}_{39}\text{O}_{83}$   $[\text{M}+4\text{H}]^{4+}$  1021.6962; found 1021.6962. Yield: 235.1 mg (55 %).

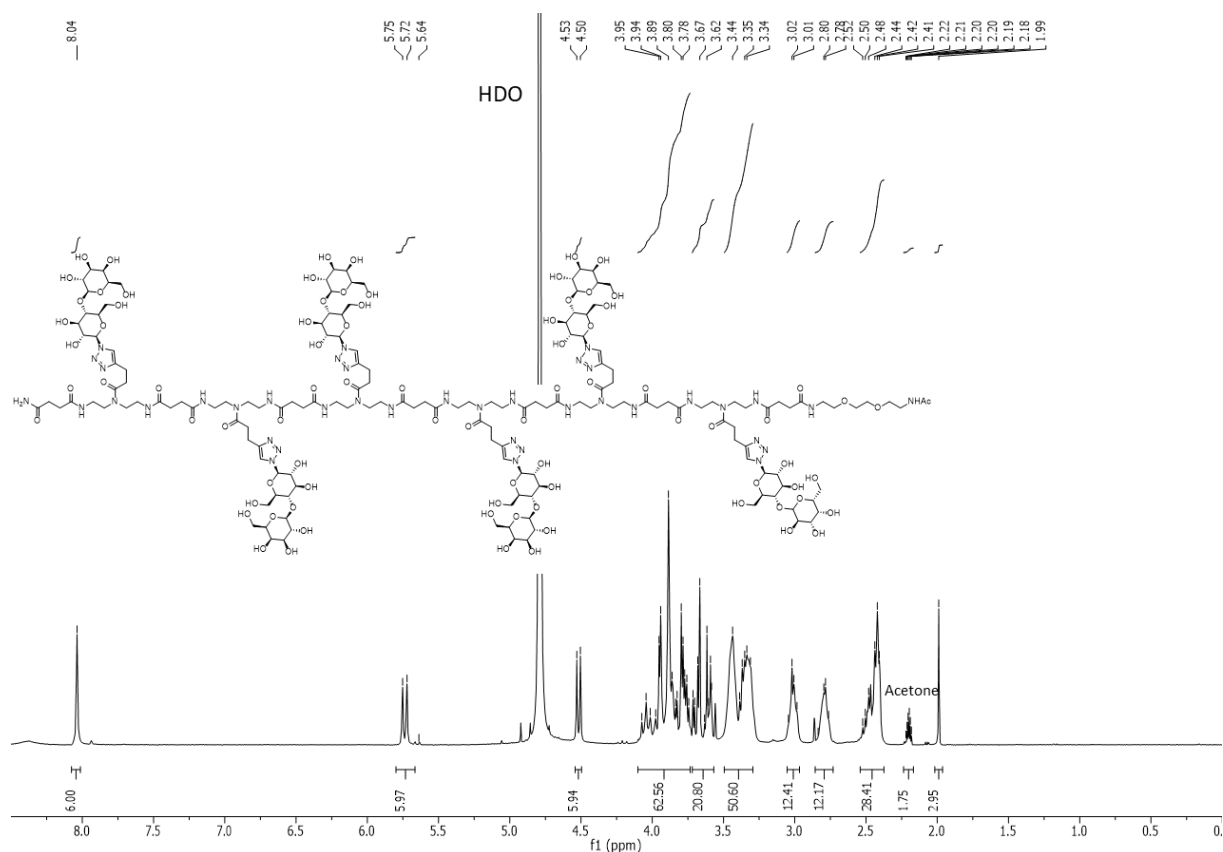

**Figure S 53:**  $^1\text{H-NMR}$  spectrum of compound 12.

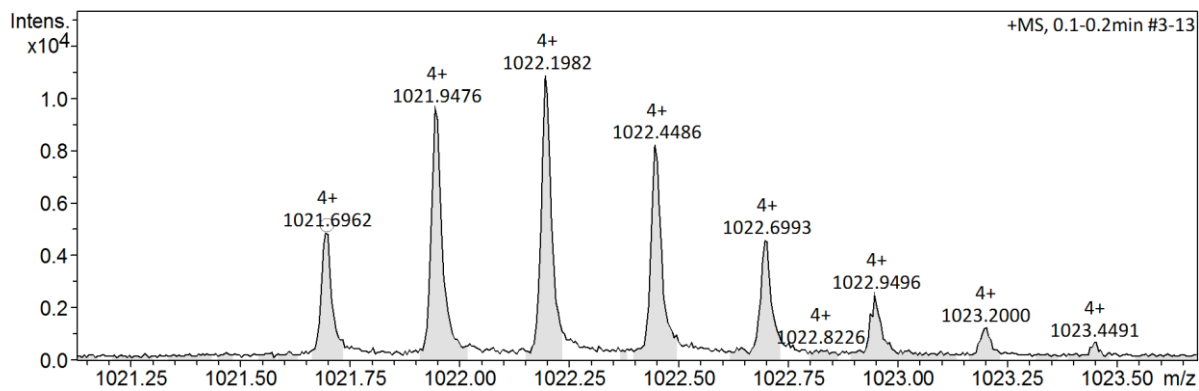

**Figure S 54:** HR-MS spectrum of compound 12.

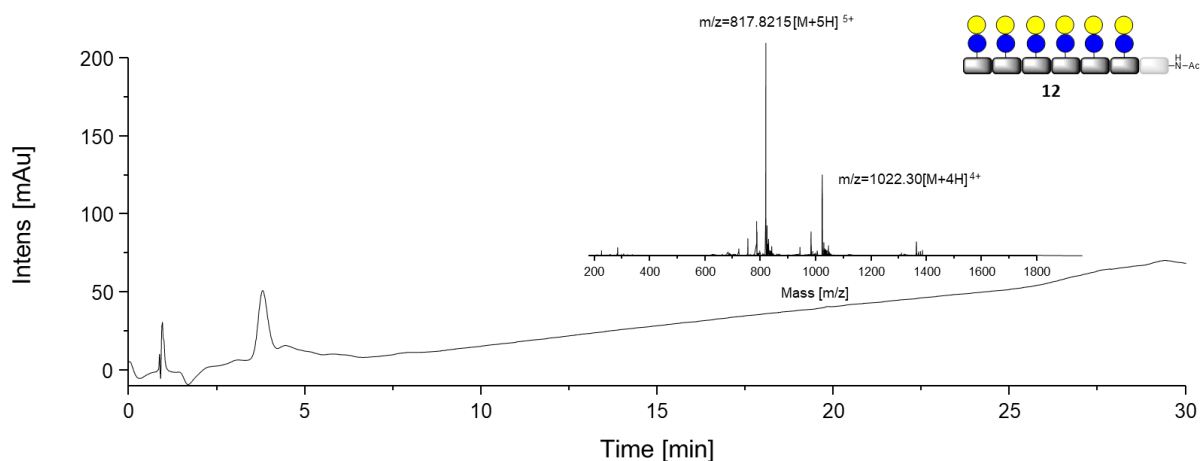

**Figure S 55:** RP-HPLC and ESI spectrum of compound **12**.

### 3.16 Lac(2)-3 L, **13**

$^1\text{H-NMR}$  (300 MHz, Deuterium Oxide)  $\delta$  [ppm]: 7.84 (s, 1H, triazole-CH), 4.53 (t, 2H,  $^3\text{J} = 6.8$  Hz, O-CH<sub>2</sub>-), 4.46 (2x d, 2H,  $^3\text{J} \approx 7.7$  Hz,  $^3\text{J} \approx 7.7$  Hz, CH<sub>anomer</sub>Glc, CH<sub>anomer</sub>-Gal), 4.01-3.70 (m, 7H, CH<sub>pyranose</sub>), 3.70-3.51 (m, 22H, O-CH<sub>2</sub>-, CH<sub>pyranose</sub>-, -N-N-CH<sub>2</sub>-), 3.50-3.29 (m, 17, C=ONH-CH<sub>2</sub>, CH<sub>pyranose</sub>), 3.00 (t,  $^3\text{J} = 7.0$  Hz, 2H, CH=CH-CH<sub>2</sub>), 2.79 (t,  $^3\text{J} = 7.1$  Hz, 2H, CH=CH-CH<sub>2</sub>-CH<sub>2</sub>), 2.57-2.43 (m, 12H, NHC=O-CH<sub>2</sub>), 2.21 (p, 2H,  $^3\text{J} = 6.6$  Hz, CH<sub>2</sub>-CH<sub>2</sub>-CH<sub>2</sub>), 1.99 (s, 3H, CH<sub>3</sub>). HR-MS (ESI): m/z calc. for C<sub>50</sub>H<sub>89</sub>N<sub>11</sub>O<sub>23</sub> [M+2H]<sup>2+</sup> 605.8061; found 605.8072. Yield: 235.1 mg (55 %).

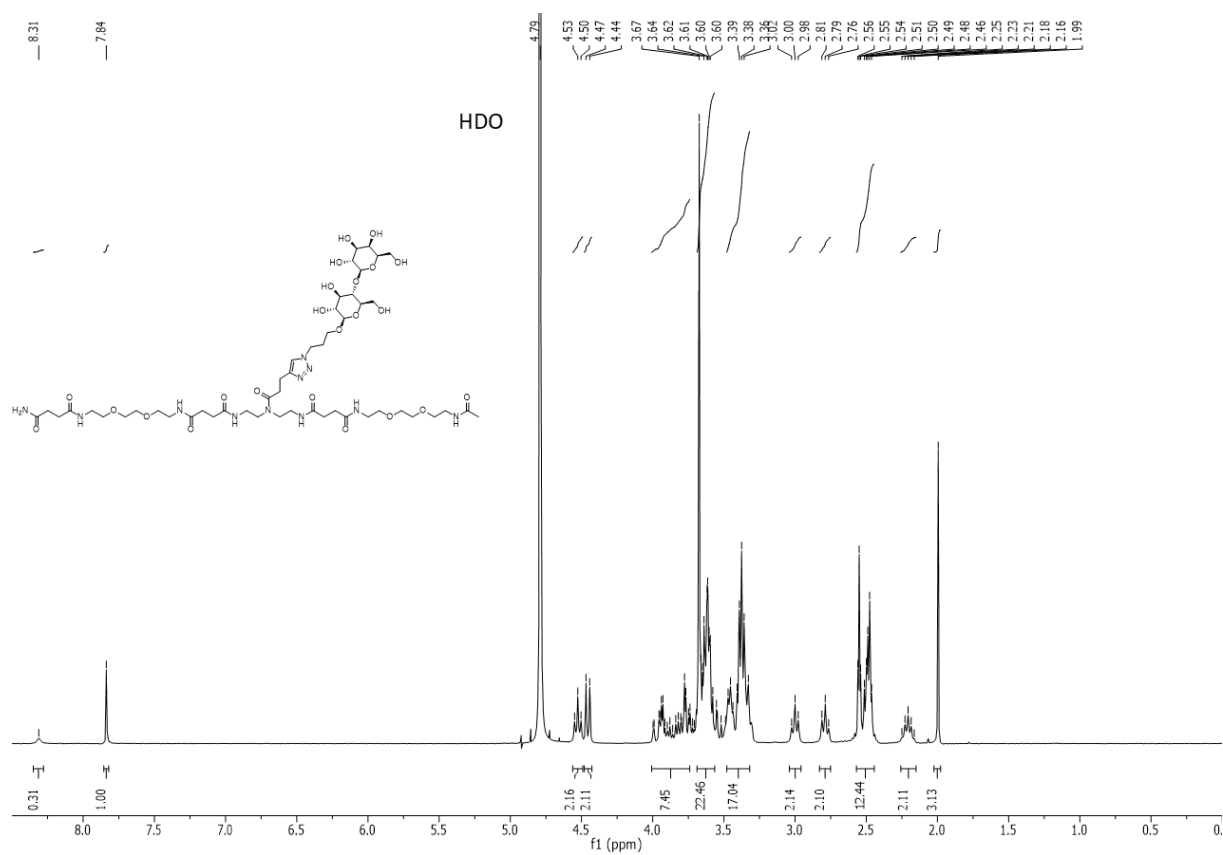

Figure S 56:  $^1\text{H-NMR}$  spectrum of compound 13.

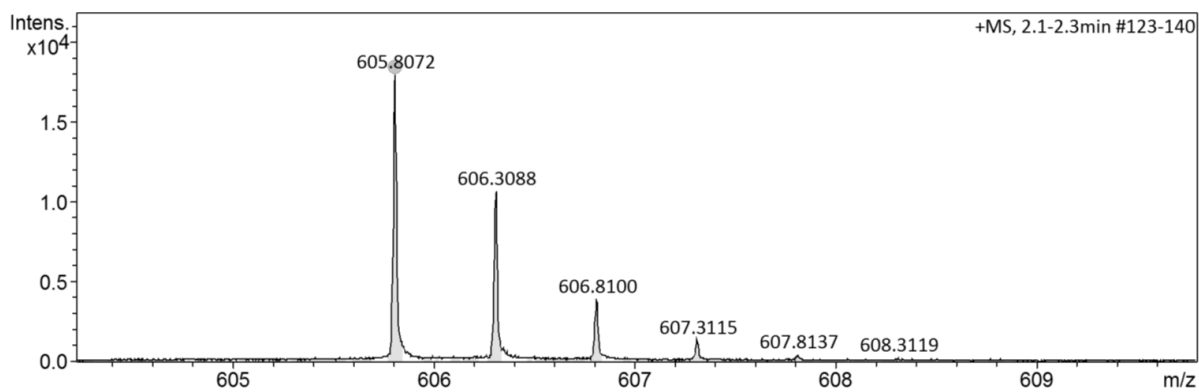

Figure S 57: HR-MS spectrum of compound 13.

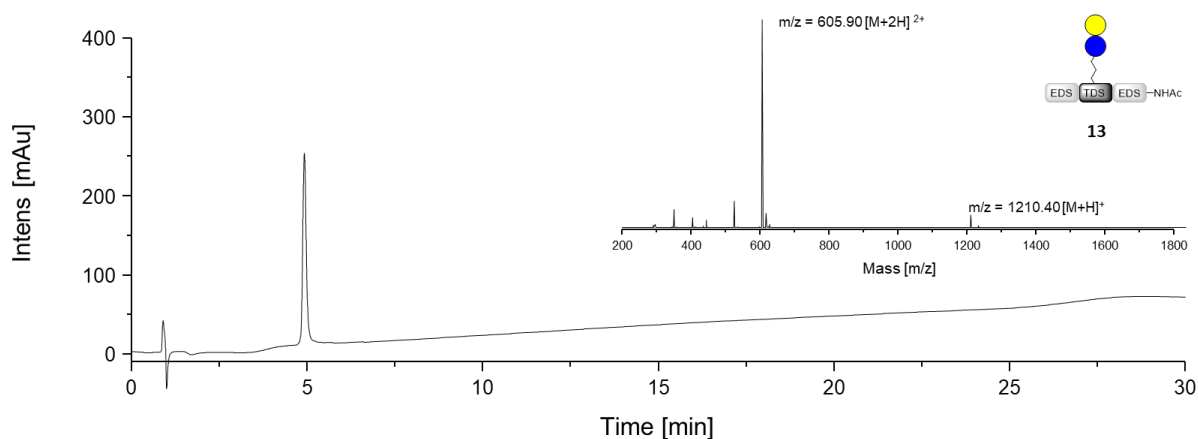

**Figure S 58:** RP-HPLC and ESI spectrum of compound **13**.

### 3.17 Lac(1,5)-5 L, **14**

$^1\text{H-NMR}$  (300 MHz, Deuterium Oxide)  $\delta$  [ppm]: 7.84 (s, 2H, triazole-CH), 4.53 (t,  $^3J = 6.8$  Hz, 4H, O-CH<sub>2</sub>propyl), 4.46 (m, 4 H, CH<sub>anomer</sub>Glc, CH<sub>anomer</sub>-Gal), 4.01-3.70 (m, 13H, CH<sub>pyranose</sub>), 3.70-3.51 (m, 37H, O-CH<sub>2</sub>-, CH<sub>pyranose</sub>-, -N-N-CH<sub>2</sub>-), 3.50-3.29 (m, 30H, C=ONH-CH<sub>2</sub>, CH<sub>pyranose</sub>), 3.00 (t,  $^3J = 7.0$  Hz, 4H, CH=CH-CH<sub>2</sub>), 2.79 (t, 4H, CH=CH-CH<sub>2</sub>-CH<sub>2</sub>), 2.56-2.45 (m, 20H, NHC=O-CH<sub>2</sub>), 2.21 (m, 4H, CH<sub>2</sub>-CH<sub>2</sub>-CH<sub>2</sub>), 1.94 (s, 1.5H, CH<sub>3</sub>), 1.91 (s, 1.5H, CH<sub>3</sub>). HR-MS (ESI):  $m/z$  calc. for C<sub>88</sub>H<sub>154</sub>N<sub>19</sub>O<sub>41</sub> [M+3H]<sup>3+</sup> 711.0178; found 711.0183. Yield: 120.7 mg (23 %).



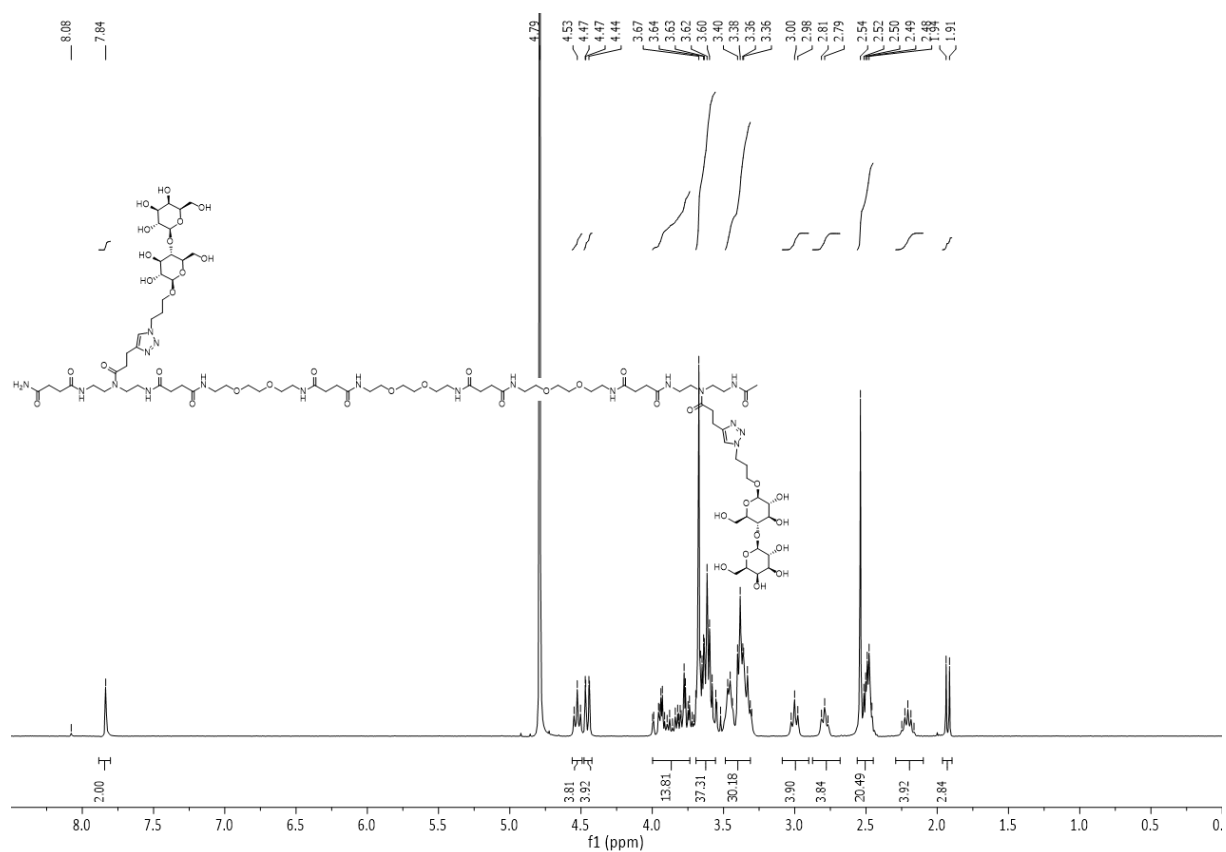

**Figure S 59:**  $^1\text{H-NMR}$  spectrum of compound **14**.

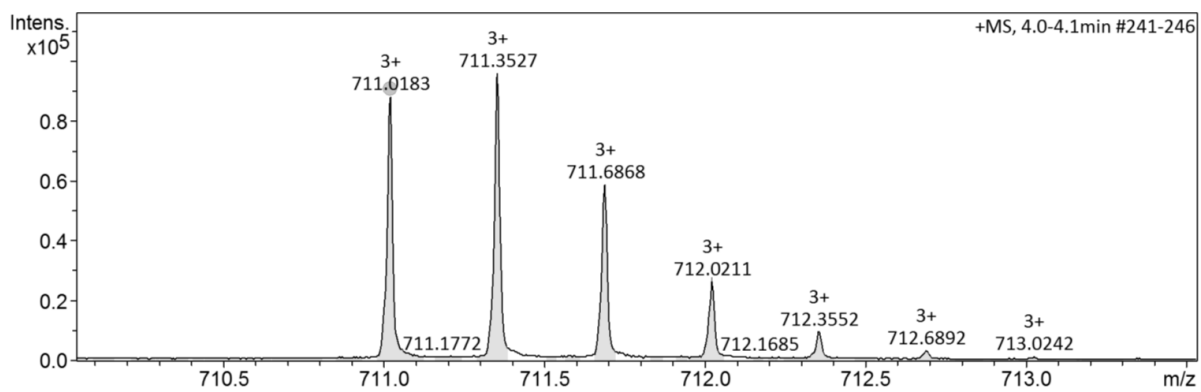

**Figure S 60:** HR-MS spectrum of compound **14**.

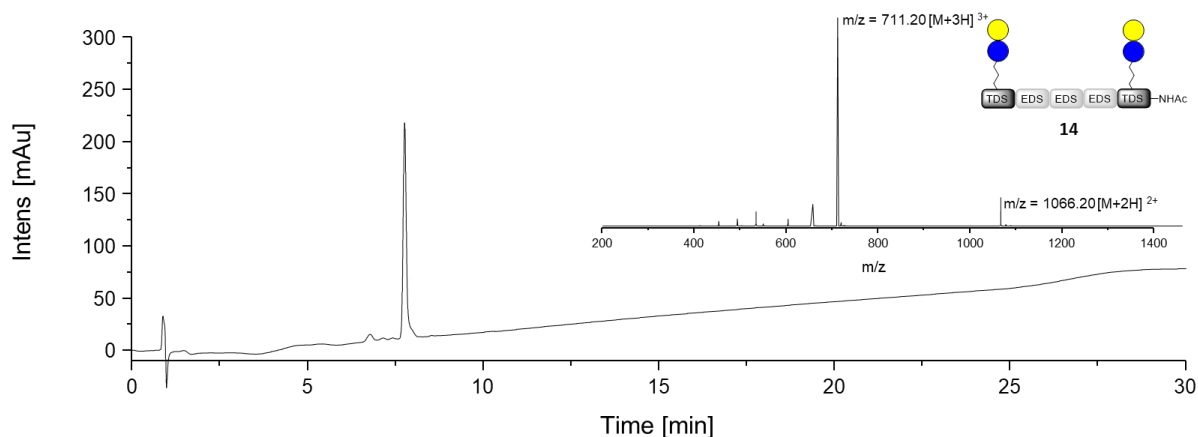

**Figure S 61:** RP-HPLC and ESI-MS spectrum of compound **14**.

### 3.18 Lac(1,5,9)-9 L, **15**

$^1\text{H-NMR}$  (300 MHz, Deuterium Oxide)  $\delta$  [ppm]: 7.84 (s, 3H, triazole-CH), 4.53 (t,  $^3\text{J} = 6.8$  Hz, 6H, O-CH<sub>2</sub>propyl-), 4.46 (m, 6H, CH<sub>anomer</sub>Glc, CH<sub>anomer</sub>-Gal), 4.01-3.70 (m, 20H, CH<sub>pyranose</sub>), 3.70-3.51 (m, 66H, O-CH<sub>2</sub>-, CH<sub>pyranose</sub>-, -N-N-CH<sub>2</sub>-), 3.50-3.30 (m, 52H, CH<sub>pyranose</sub>-, C=ONH-CH<sub>2</sub>), 3.00 (t,  $^3\text{J} = 6.9$  Hz, 6H, CH=CH-CH<sub>2</sub>), 2.79 (t,  $^3\text{J} = 7.0$  Hz, 6H, CH=CH-CH<sub>2</sub>-CH<sub>2</sub>), 2.56-2.45 (m, 36H, NHC=O-CH<sub>2</sub>), 2.21 (m, 6H, CH<sub>2</sub>-CH<sub>2</sub>-CH<sub>2</sub>), 1.94 (s, 1.5H, CH<sub>3</sub>), 1.91 (s, 1.5H, CH<sub>3</sub>). HR-MS (ESI):  $m/z$  calc. for C<sub>146</sub>H<sub>255</sub>N<sub>31</sub>O<sub>67</sub> [M+4H]<sup>4+</sup> 878.6869; found 878.6877. Yield: 69.9 mg (22 %).

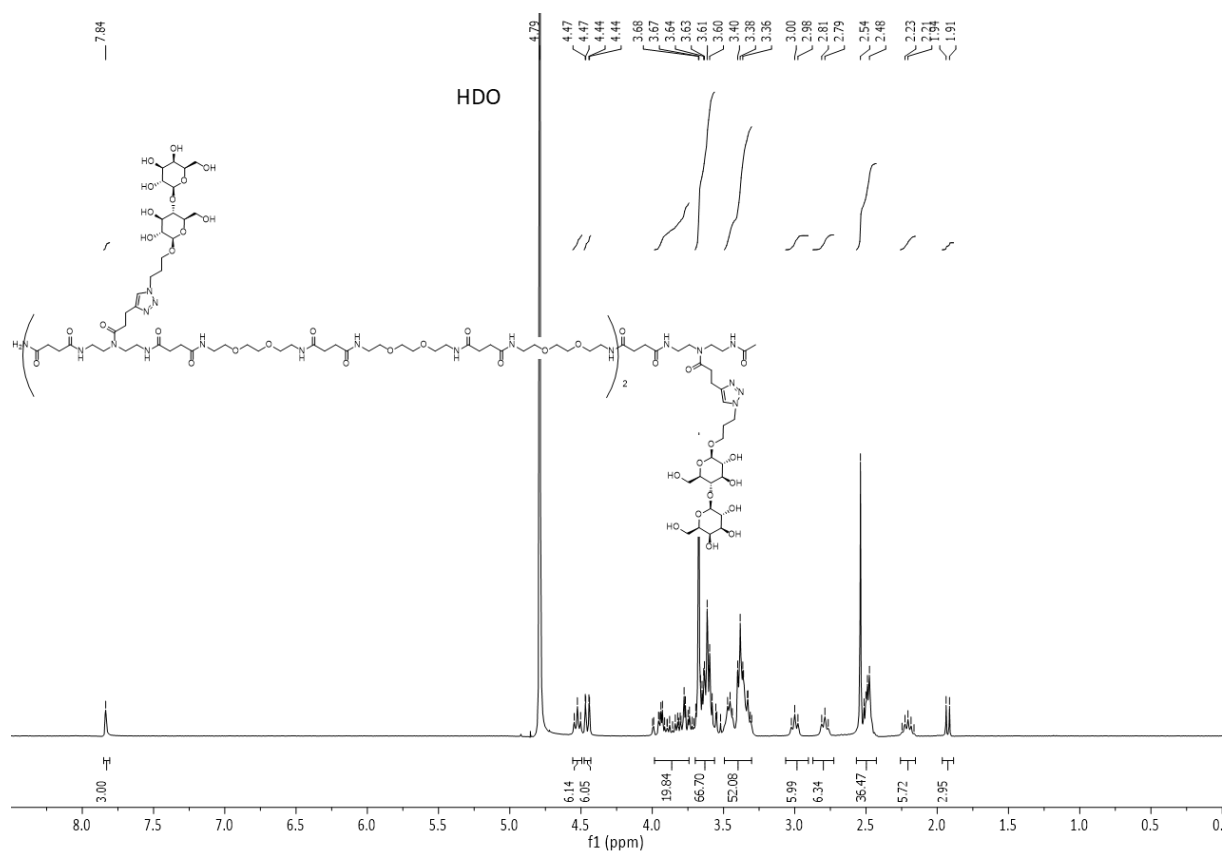

Figure S 62:  $^1\text{H-NMR}$  spectrum of compound 15.

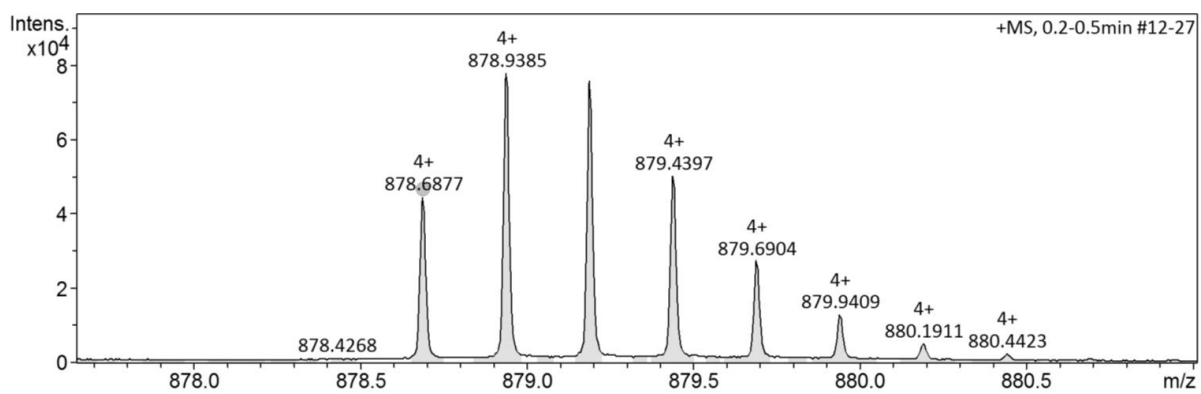

Figure S 63: HR-MS spectrum of compound 15.

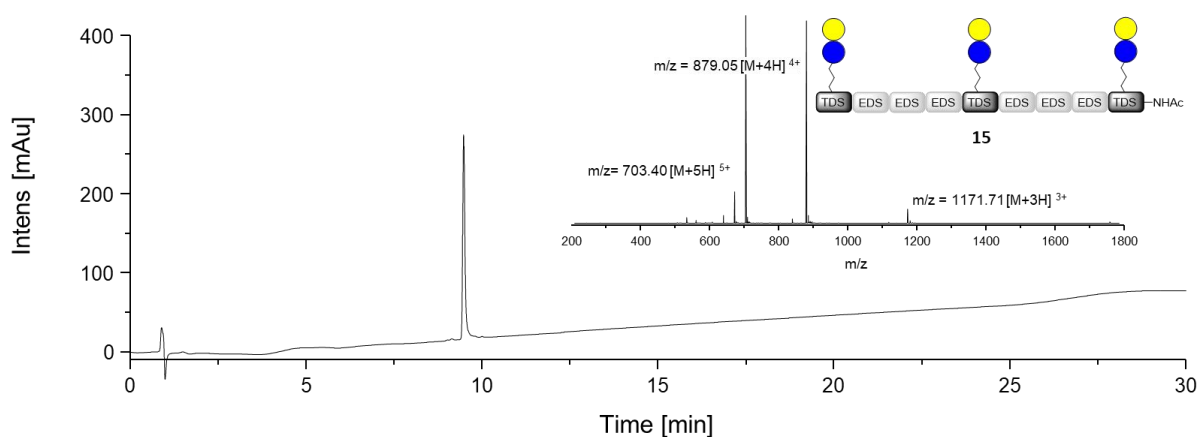

**Figure S 64:** RP-HPLC and ESI-MS spectrum of compound **15**.

### 3.19 Glc(1,3,5)-6, **16**

$^1\text{H-NMR}$  (300 MHz,  $\text{D}_2\text{O}$ )  $\delta$  [ppm] 7.93 – 7.87 (m, 3H, triazole-CH), 4.88 (d,  $J = 3.4$  Hz, 2.7H,  $\text{CH}_{\text{anomerGlc}}$ ), 4.72 – 4.59 (m, 6H, -N-N- $\text{CH}_2$ ), 4.43 (d,  $J = 7.9$  Hz, 0.3H,  $\text{CH}_{\text{anomerGlc}}$ ), 4.16 – 4.02 (m, 3H, O- $\text{CH}_2$ -), 4.00 – 3.86 (m, 3H, O- $\text{CH}_2$ -), 3.73 – 3.56 (m, 33H, O- $\text{CH}_2$ -, C=ONH- $\text{CH}_2$ ,  $\text{CH}_{\text{pyranose}}$ ), 3.55 – 3.43 (m, 17H, O- $\text{CH}_2$ -), 3.42 – 3.30 (m, 27H,  $\text{CH}_2$ - $\text{NH}_2$ ), 3.00 (t,  $J = 7.3$  Hz, 6H, CH=C- $\text{CH}_2$ ), 2.92 – 2.74 (m, 9H, CH=C- $\text{CH}_2$ - $\text{CH}_2$ ), 2.58 – 2.42 (m, 24H, NHC=O- $\text{CH}_2$ ), 2.00 (s, 3H, - $\text{CH}_3$ ). HR-MS (ESI) calc. for  $\text{C}_{95}\text{H}_{164}\text{N}_{25}\text{O}_{40}$   $[\text{M}+3\text{H}]^{3+}$  765.0517; found 765.0527. Yield: 110 mg (48 %).

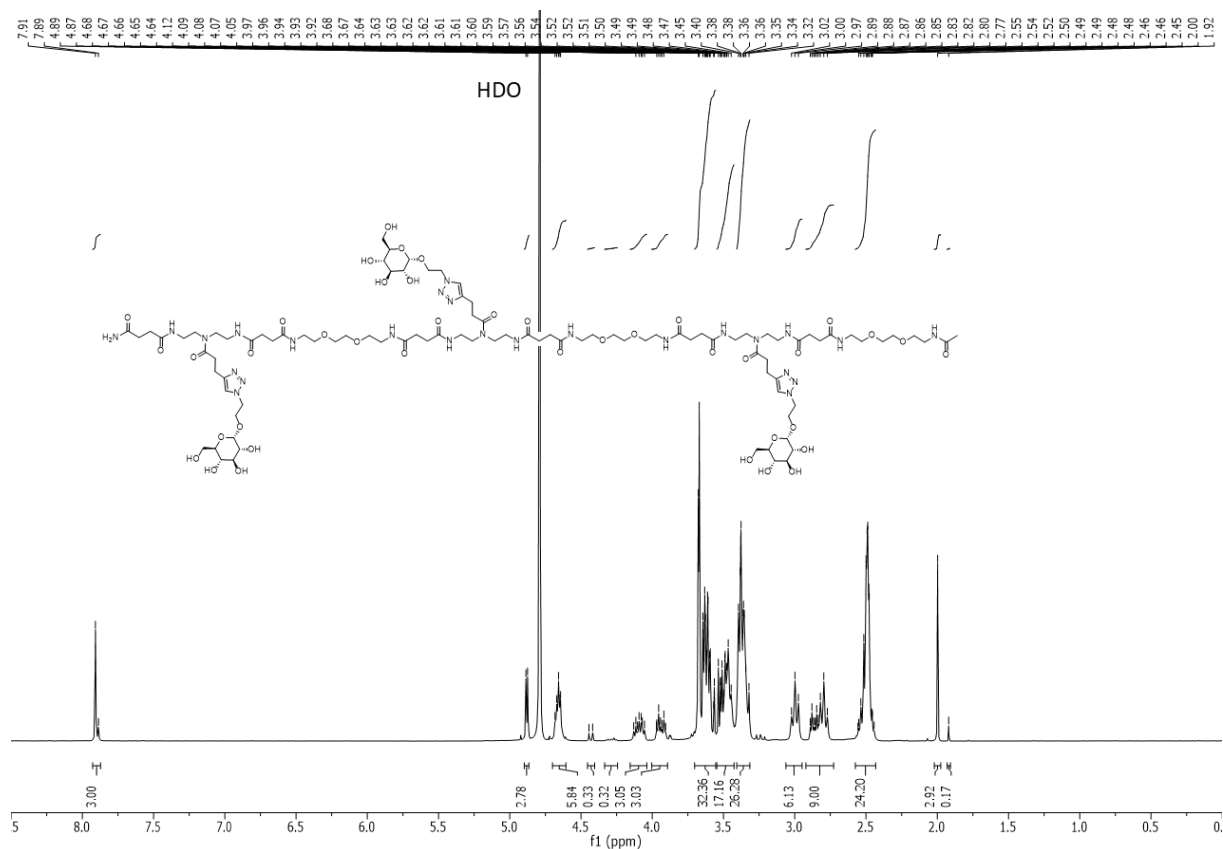

Figure S 65:  $^1\text{H-NMR}$  spectrum of compound 16.

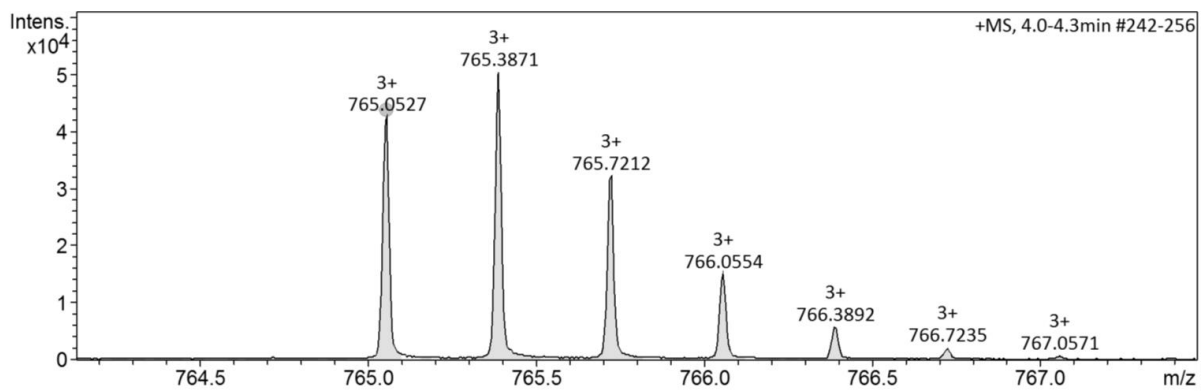

Figure S 66: HR-MS spectrum of compound 16.

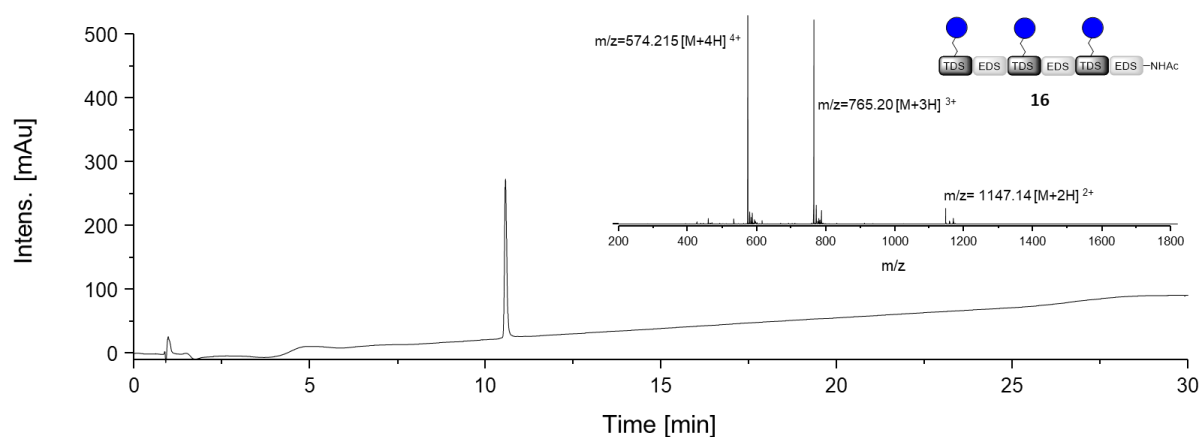

**Figure S 67:** RP-HPLC and ESI-MS spectrum of compound **16**.

### 3.20 Glc(1,3,5)-6, **16\***

$^1\text{H-NMR}$  (600 MHz, Deuterium Oxide)  $\delta$  [ppm]: 8.46 (br s, 1 H, NH). 7.88 (m, 3H, triazole-CH), 4.80 (m, 3H,  $\text{CH}_{\text{anomerGlc}}$ ), 4.64 (m, 6H, -N-N- $\text{CH}_2$ -), 4.41 (d,  $^3J_{\text{HH}} = 7.9$  Hz, 0.6H,  $\text{CH}_{\text{anomerGlc}}$ ), 4.07 (m, 3H, O- $\text{CH}_2$ -), 3.91 (m, 3H, O- $\text{CH}_2$ -), 3.75 (dd,  $^3J_{\text{HH}} = 5.6; 4.6$  Hz, 2H, O- $\text{CH}_2$ -), 3.69 (s, 4H, O- $\text{CH}_2$ -), 3.65 (s, 8H, O- $\text{CH}_2$ -), 3.63 – 3.28 (m, 59H, O- $\text{CH}_2$ -, C=ONH- $\text{CH}_2$ ,  $\text{CH}_{\text{pyranose}}$ ), 3.21 (m, 2H,  $\text{CH}_2$ -NH $_2$ ), 2.98 (m, 6H, CH=C- $\text{CH}_2$ ), 2.87– 2.75 (m, 9H, CH=C- $\text{CH}_2$ - $\text{CH}_2$ ), 2.48 (m, 24H, NHC=O- $\text{CH}_2$ ). ESI-MS  $m/z$  calc. for  $\text{C}_{93}\text{H}_{162}\text{N}_{25}\text{O}_{39}$   $[\text{M}+3\text{H}]^{3+}$  751.04. found: 751.25. Yield: 86 mg (38 %).

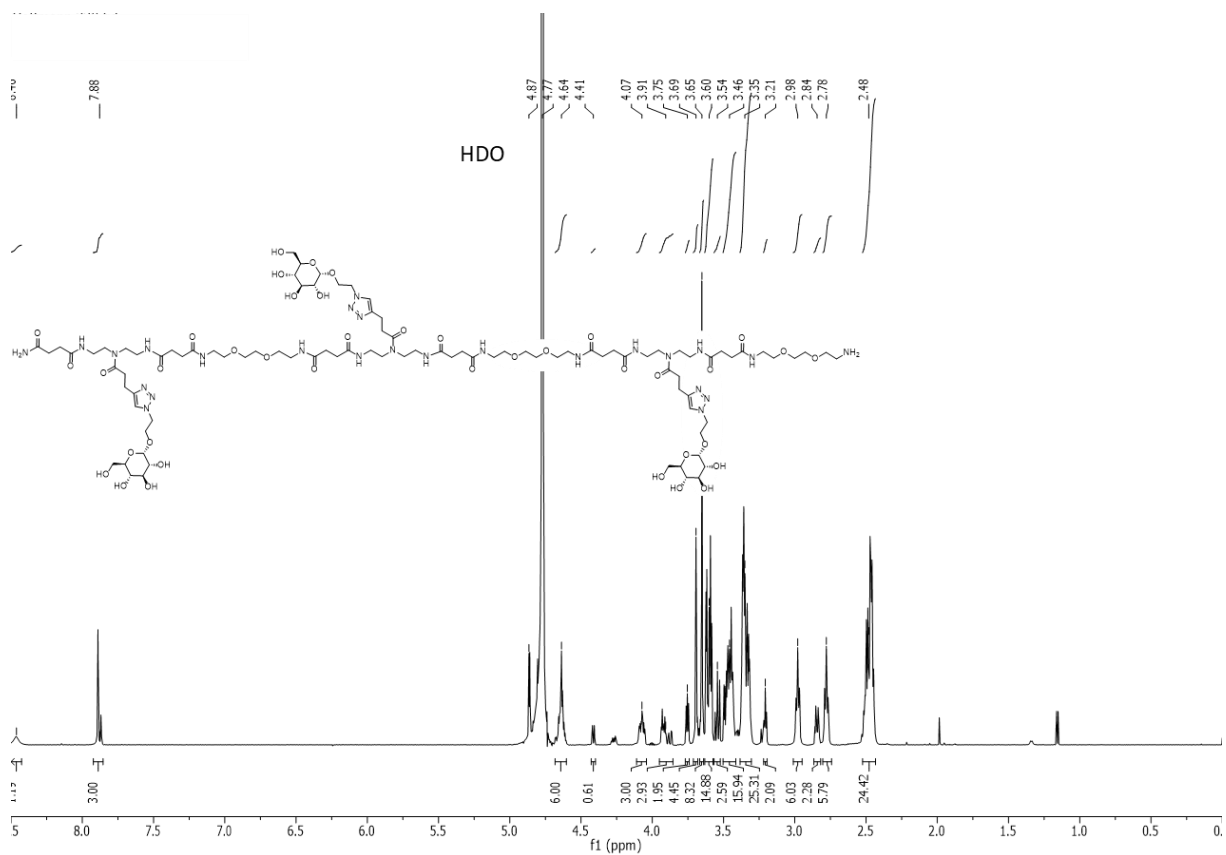

Figure S 68: <sup>1</sup>H-NMR spectrum of compound 16\*.

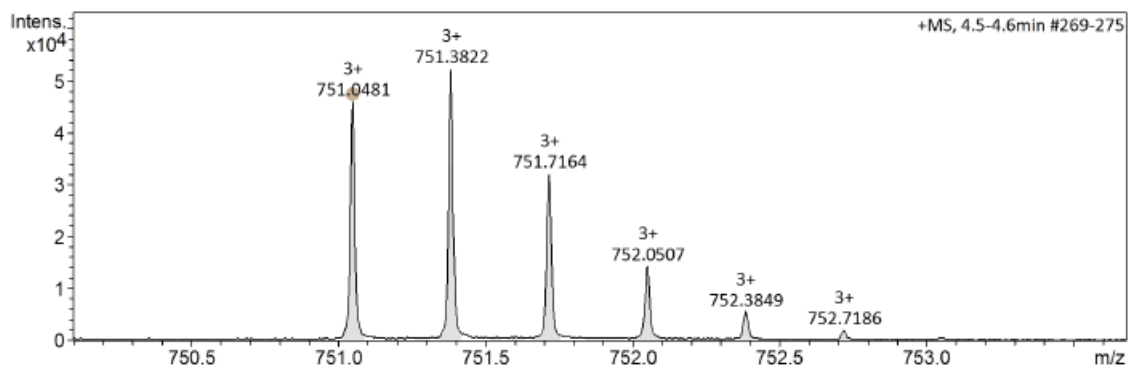

Figure S 69: HR-MS spectrum of compound 16\*.

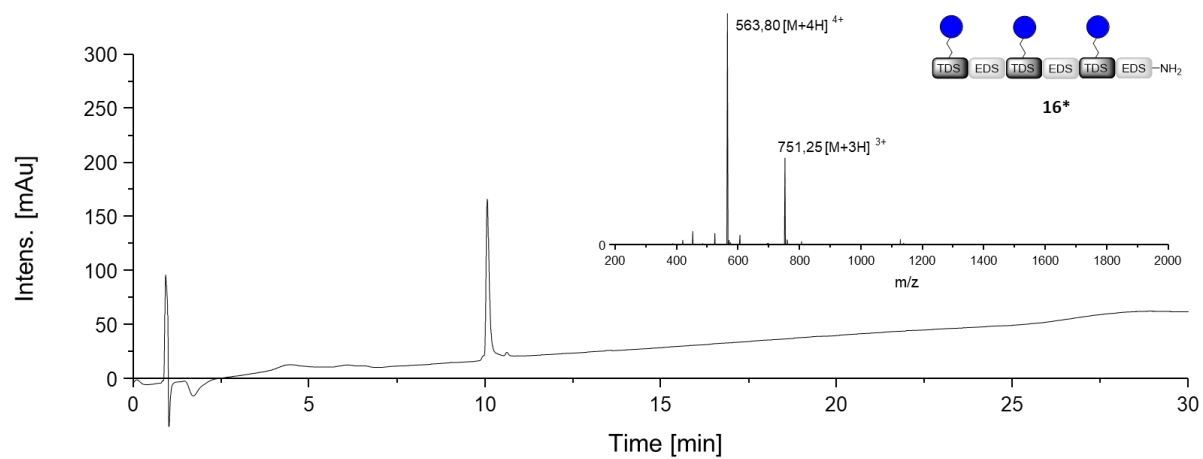

**Figure S 70:** RP-HPLC and ESI-MS spectrum of compound **16\***.



#### 4. Analytical data for glycomacromolecule-lipid conjugates

##### 4.1. Lac(1)-2-PEG-DSPE-conjugate, **L4**

Yield: 2.01 mg (58 %). Conversion: 66 %. MALDI-TOF-MS calc. for  $C_{173}H_{330}N_{11}O_{73}PNa$

$[M+Na]^+$  3786.5; found: 3787.8.

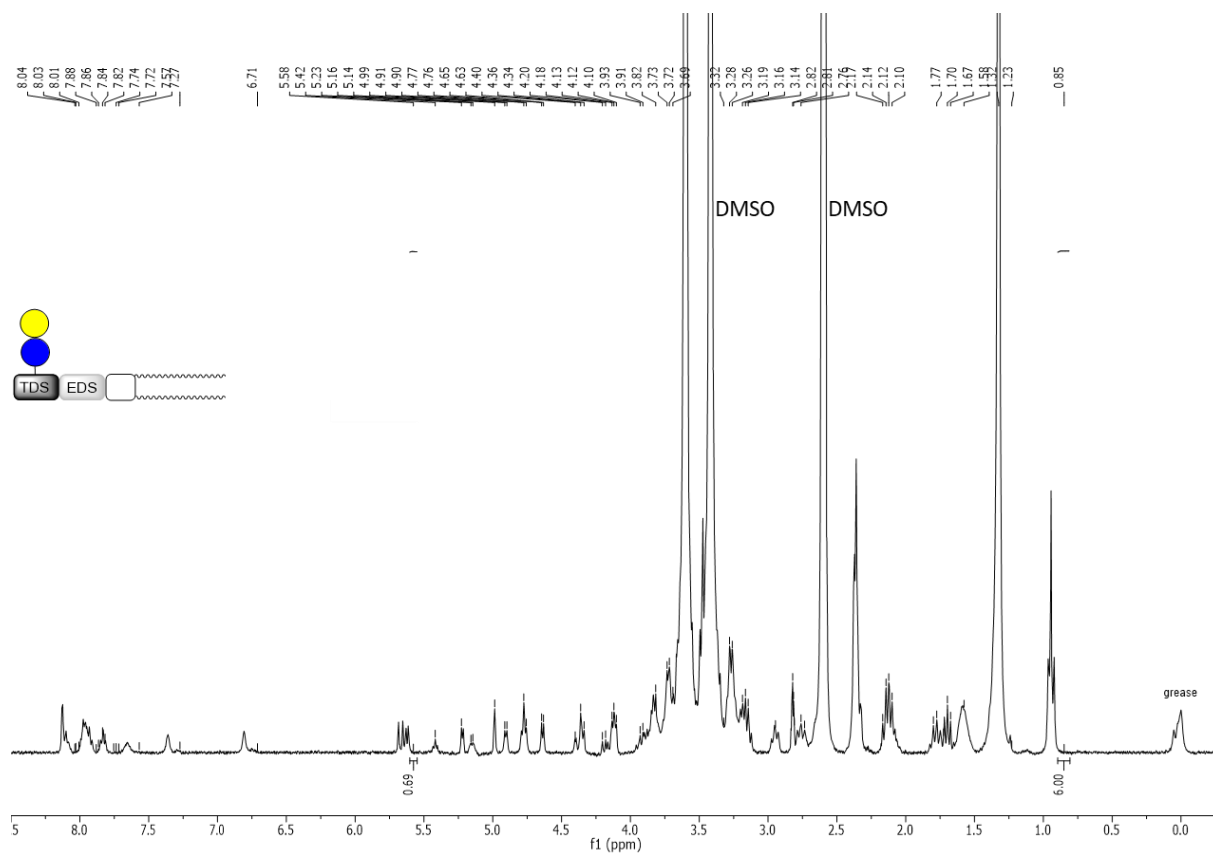

**Figure S 71:**  $^1H$ -NMR spectrum of compound **L4**.

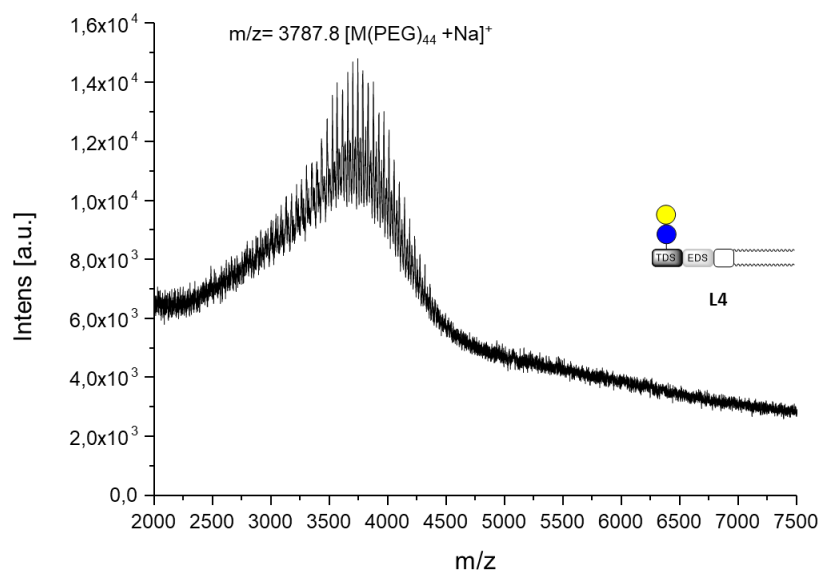

Figure S 72: MALDI-TOF-MS-spectrum of compound L4.

#### 4.2. Lac(1,3,5)-6-PEG-DSPE-conjugate, L9

Yield: 2.26 mg (44 %). Conversion: 56 %. MALDI-TOF-MS calc. für  $C_{243}H_{446}N_{27}O_{107}PNa$

$[M+Na]^+$  5511.3; found: 5511.6.

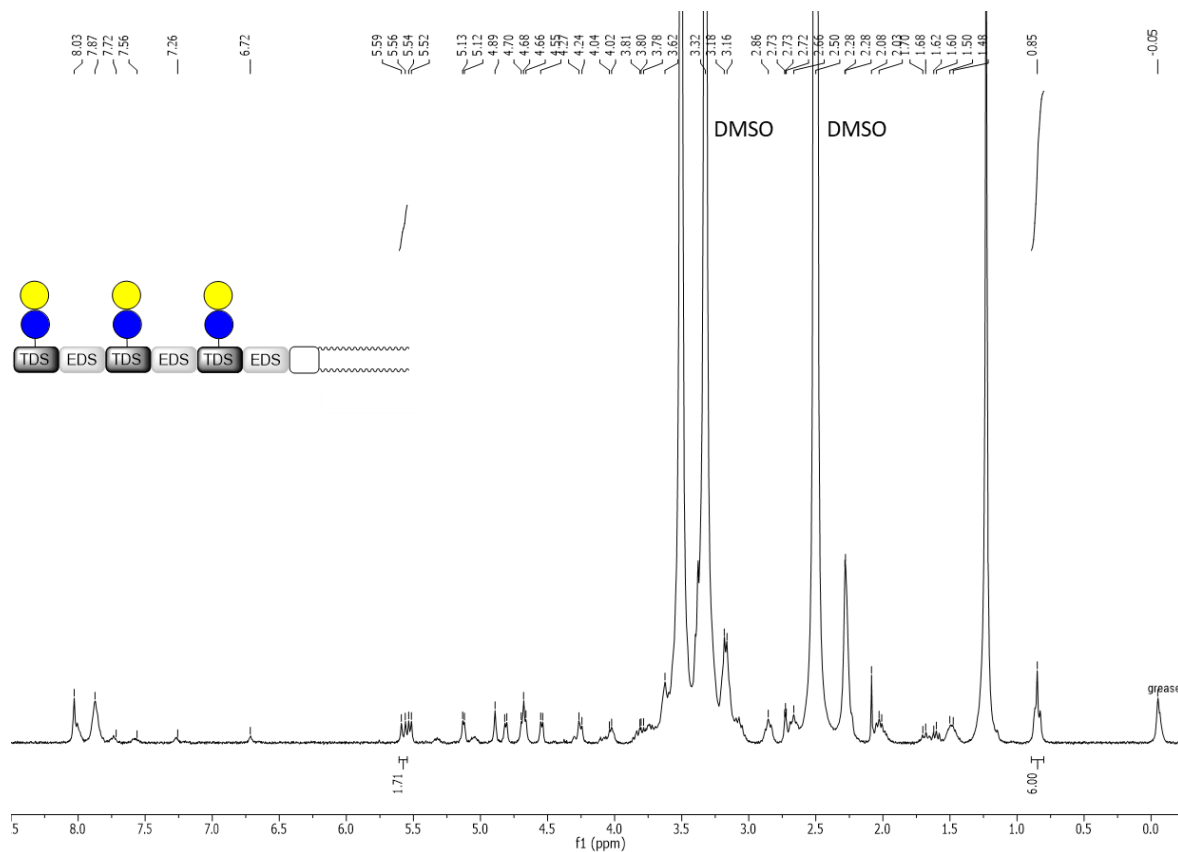

Figure S 73:  $^1H$ -NMR spectrum of compound L9.

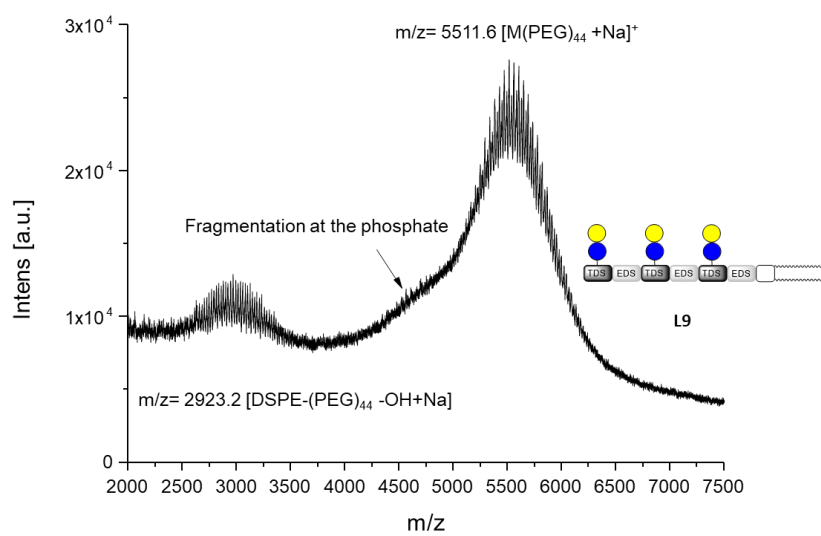

**Figure S 74:** MALDI-TOF-MS-spectrum of compound **L9**.

### 4.3. Lac(1,2,3)-4-PEG-DSPE-conjugate, **L10**

Yield: 3.00 mg (69 %). Conversion: 66 %. MALDI-TOF-MS calc. for  $C_{223}H_{410}N_{23}O_{99}PNa$

$[M+Na]^+$  5051.8; found 5052.5.

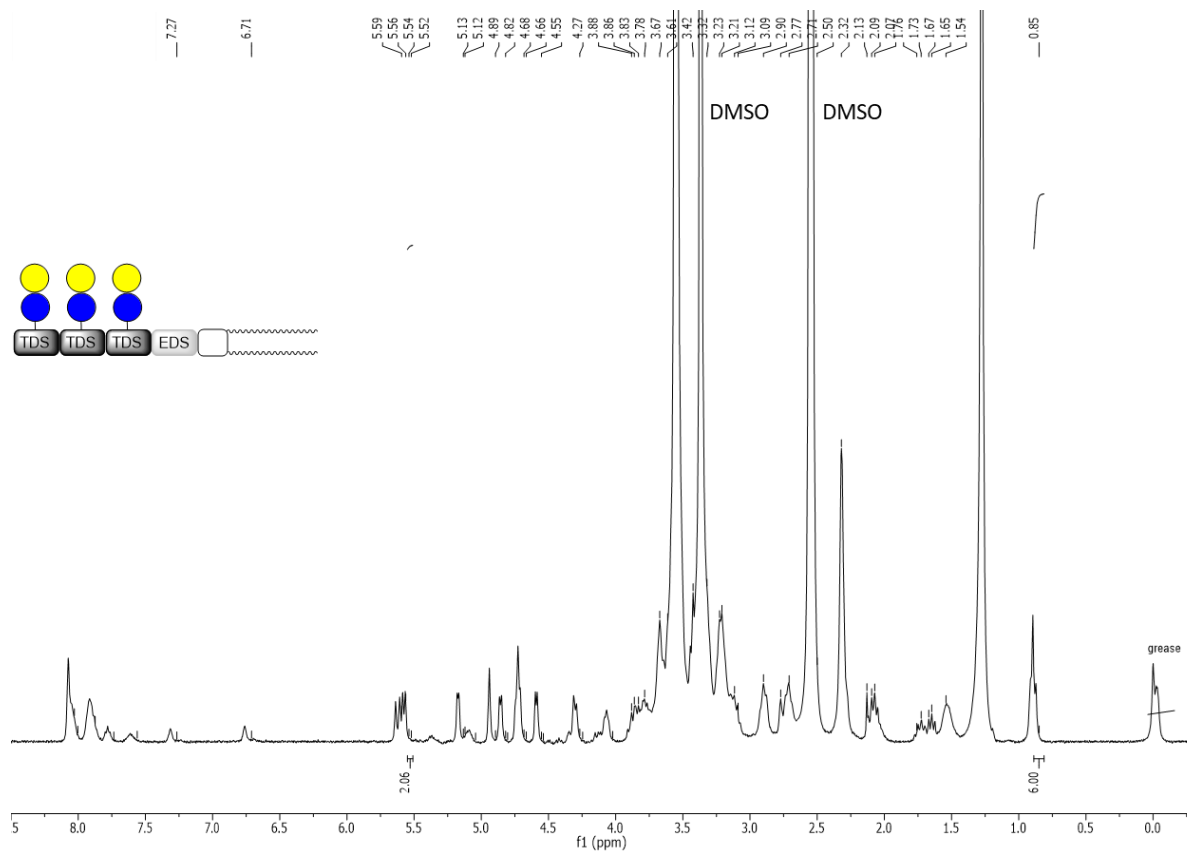

**Figure S 75:**  $^1H$ -NMR spectrum of compound **L10**.

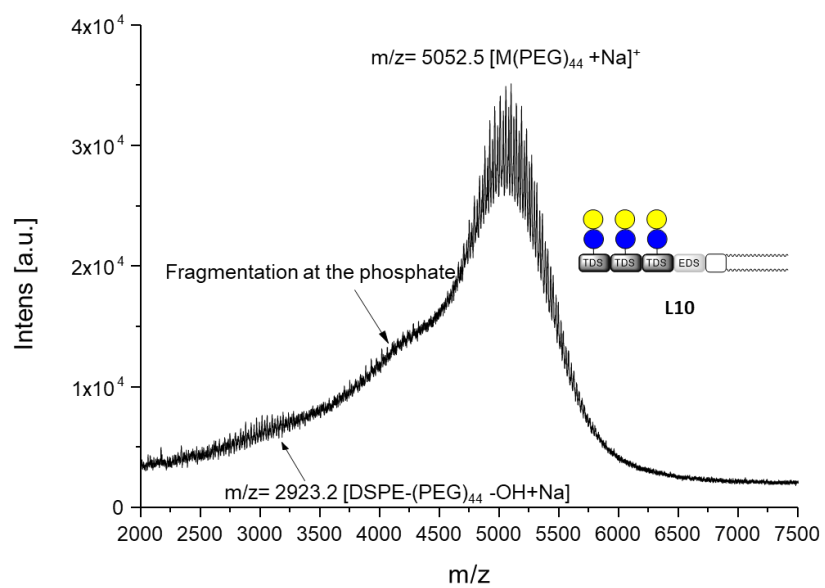

**Figure S 76:** MALDI-TOF-MS-spectrum of compound **L10**.

#### 4.4. Glc(1,3,5)-6-PEG-DSPE-conjugate, **L16**

Yield: 1.54 mg (35 %). Conversion: 62 % (as determined by  $^1\text{H-NMR}$ ). MALDI-TOF-MS  
calc. for  $\text{C}_{231}\text{H}_{428}\text{N}_{27}\text{O}_{95}\text{PNa}$   $[\text{M}+\text{Na}]^+$  5158.0; found: 5158.7.

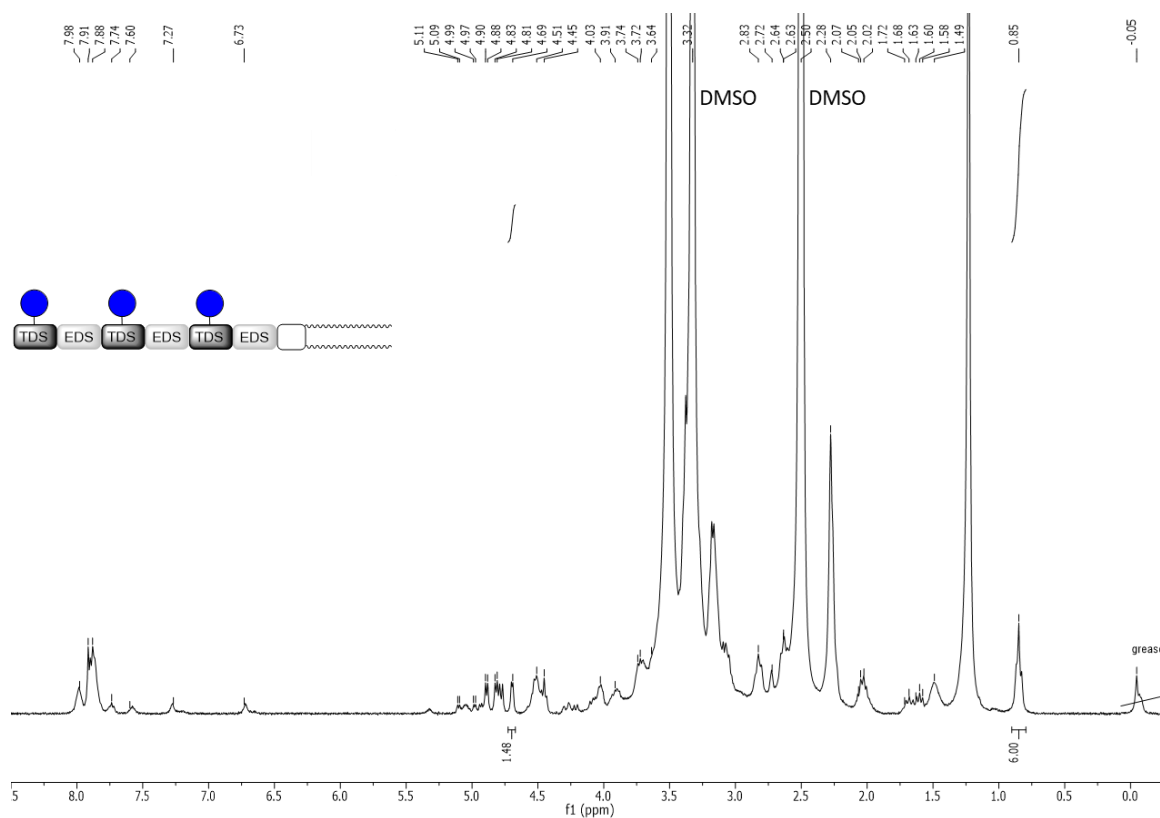

**Figure S 77:**  $^1\text{H-NMR}$  spectrum of compound **L16**.

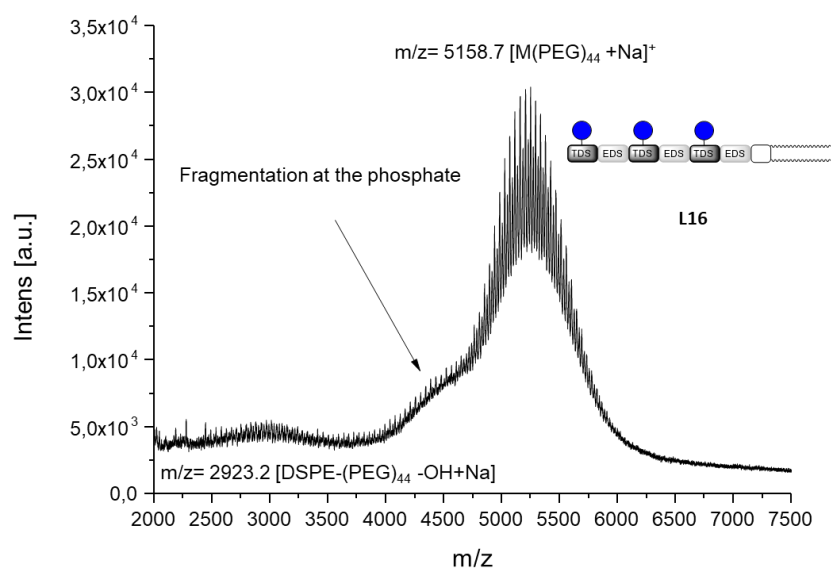

**Figure S 78:** MALDI-TOF-MS-spectrum of compound **L16**.

## 5. Analytical data of liposomes

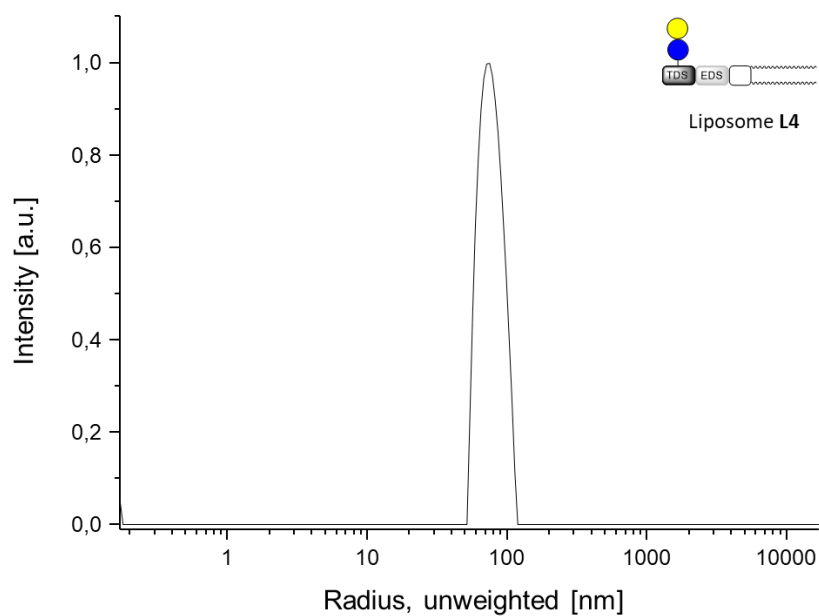

**Figure S 79:** Exemplary DLS spectrum of **liposome L4**.

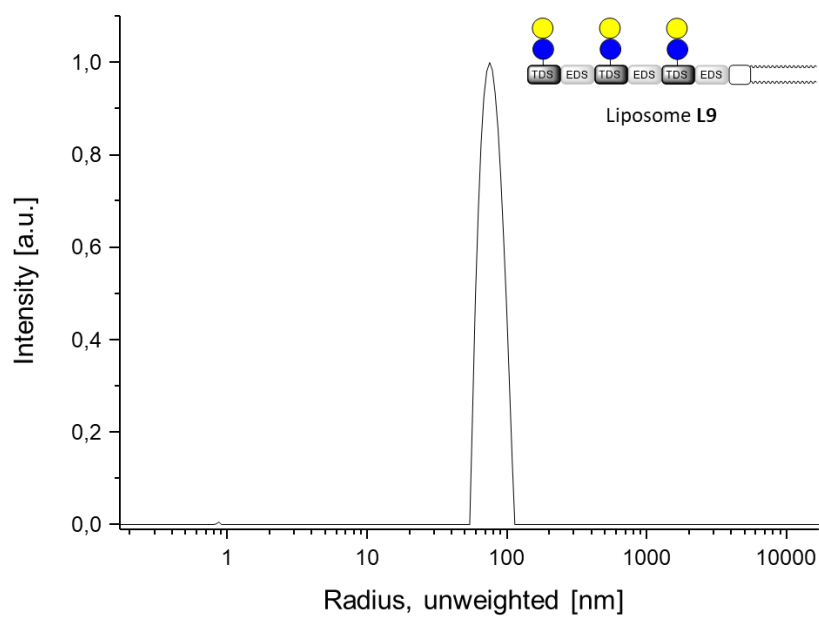

**Figure S 80:** Exemplary DLS spectrum of **liposome L9**.

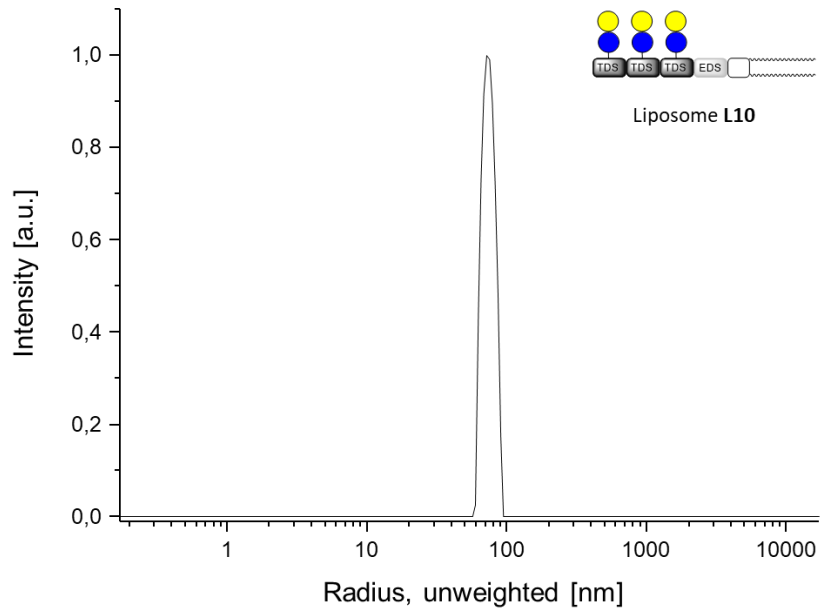

**Figure S 81:** Exemplary DLS spectrum of liposome L10.

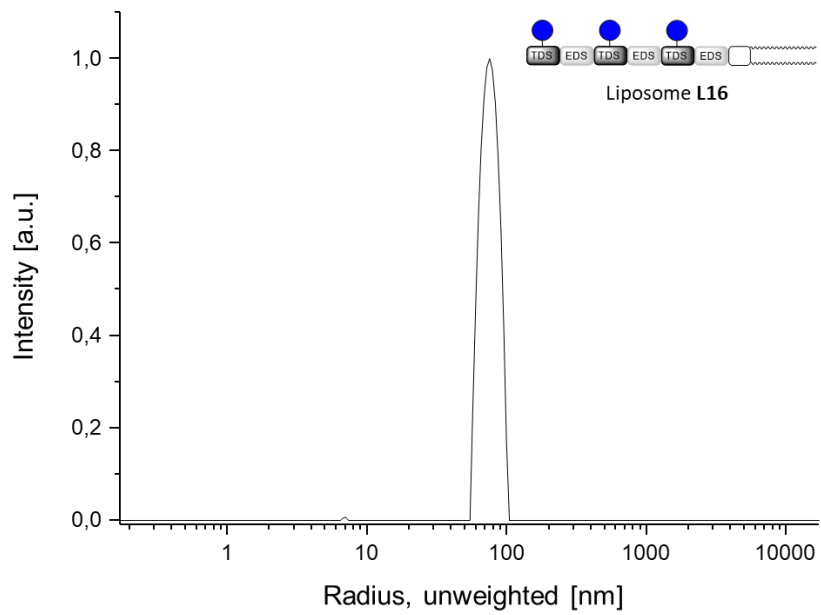

**Figure S 82:** Exemplary DLS spectrum of liposome L16.
